# Supplementary material for: Thermal stress jeopardizes carbonate production of coral reefs across the western and central Pacific Ocean
Source: PubMed Central journal article supplement (PMC8075252; doi:10.1371/journal.pone.0249008), 2021-04-26
Supplement: pone.0249008.s001.pdf [file pone.0249008.s001.pdf]

Supplementary document for:

# Carbonate production of coral reefs across the western and central Pacific Ocean

*R. van Woelik and C. Cacciapaglia*

## Extended methods

The primary task of this work was to determine the contribution of the various components on each reef to potential carbonate production. Coral cover was calculated as the sum of live coral cover for each transect. Net carbonate production ( $\text{kg CaCO}_3 \text{ m}^{-2} \text{ yr}^{-1}$ ) was considered as:

$$\text{Carbonate production}_i = \text{Cal}_i + \text{sgn}(x)\text{Sed}_i - \text{Eros}_i \quad (1),$$

where  $\text{Cal}$  is the rate of calcification by reef-building corals and coralline algae, at a site  $i$ ,  $\text{sgn}$  is positive when local sedimentation ( $\text{Sed}$ ) is low, and negative when local sedimentation is high, and  $\text{Eros}$  is the rate of erosion (van Woelik and Cacciapaglia 2018, 2019). Gross carbonate production was estimated in units of  $\text{kg CaCO}_3 \text{ m}^{-2} \text{ yr}^{-1}$ , and was summed across all calcifying species of reef accretors, where  $\text{Cal}$  was estimated as:

$$\text{Cal}_i = r_i * \{\Sigma[(m_{i,j} * x_{i,j} / 100) * d_{i,j} * g_{i,j} * 10] + ca_i\} \quad (2),$$

where  $r$  is the averaged rugosity of site  $i$ ,  $m$  is the morphological adjustment coefficient for coral morphologies at site  $i$  for species  $j$ ,  $x$  is the mean percent planar cover of carbonate-accreting species  $j$  at site  $i$ ,  $d$  is the density ( $\text{g cm}^{-3}$ ) of species  $j$  at site  $i$ , and  $g$  is the vertical growth rate ( $\text{cm year}^{-1}$ ) of species  $j$  at site  $i$ . Ten was inserted in the model as an adjustment coefficient to set the units at  $\text{kg CaCO}_3 \text{ m}^2 \text{ yr}^{-1}$ , and  $ca$  is the contribution of coralline algae at site  $i$  to carbonate production, which was defined as:

$$ca_i = 0.018 * (pca_i) * 10 \quad (3),$$

where  $pca$  is the planar cover of coralline algae at site  $i$ , 0.018 is the average gross carbonate production of coralline algae ( $\text{g cm}^{-2}$ ) (Perry et al. 2012), and 10 is the conversion between  $\text{g cm}^{-2}$  and  $\text{kg m}^{-2}$ .

Reef erosion was broken down into three major components, defined as:

$$\text{Eros}_i = \Sigma(\text{parrotfish}_{i,j} + \text{urchin}_{i,j}) + \text{macroboring} \quad (4),$$

where  $\text{parrotfish}$  is the biological erosion caused by parrotfish at site  $i$  by species  $j$ ,  $\text{urchin}$  is erosion caused by sea urchins at site  $i$  by species  $j$ , and  $\text{macroboring}$  is the erosion caused by macroboring organisms. The erosion caused by parrotfish was defined as:

$$\text{parrotfish}_i = \Sigma(\text{vol}_{i,j,n} * \text{sp}_{i,j,n} * \text{br}_{i,j,n}) * D_i * 365 * 0.001 \quad (5),$$

where  $\text{vol}$  is the bite volume ( $\text{cm}^3$ ) for individual  $n$  of species  $j$  at site  $i$ ,  $\text{sp}$  is the proportion of bites that leave a scar at site  $i$  for individual  $n$  of species  $j$ ,  $\text{br}$  is the bite rate ( $\text{bites day}^{-1}$ ) at site  $i$  of species  $j$  for individual  $n$ ,  $D$  is the average density of corals at site  $i$ , 365 is used to convert erosion rate to years, and 0.001 is to convert g to kg. In equation 5,  $\text{vol}$  was defined as:

$$\text{vol}_{i,j,n} = \frac{e^{1.32+0.06 * \text{length}_{i,j,n}}}{1000} \quad (6),$$

where,  $\text{length}$  is the length (cm) of parrotfish  $n$  of species  $j$  in site  $i$ , the constants 1.32 and 0.06 were generated from a regression of data from Ong & Holland (2010), and 1000 was used to

convert from mm<sup>3</sup> to cm<sup>3</sup>. In equation 5,  $sp$  is the scar proportion of fish  $n$  of species  $j$  at site  $i$ , defined as:

$$sp_{i,j,n} = 1/[1 + e^{-( -2.46 + 0.089 * length_{i,j,n} )}] \quad (7),$$

following a regression from data gathered from Bonaldo & Bellwood (2008), where  $length$  is the length (cm) of fish  $n$  of species  $j$  at site  $i$ . In equation 5,  $br$  is the bite rate (bites day<sup>-1</sup>) at site  $i$  of species  $j$  for individual  $n$ , defined as:

$$br_{i,j,n} = 60 \{ [(4.31 + brc_{i,j} - 0.36) - (0.045 * reeftime * length_{i,j,n})] \} \quad (8),$$

where  $brc$  is the bite rate constant derived from data provided by Peter Mumby (pers. comm.) for species  $j$  at site  $i$ ,  $reeftime$  is the length of time fishes spend grazing on the reef estimated at 9 hours a day,  $length$  is the length (cm) of fish  $n$  of species  $j$  at site  $i$ , 60 is to convert the units from minutes to hours, and all other constants were derived from bite rate data. The bioerosion (kg CaCO<sub>3</sub> m<sup>-2</sup>) caused by echinoids was defined as:

$$urchin_i = \Sigma(Diadema_{i,n} + Echinometra_{i,n} + Other\ urchins_{i,n}) \quad (9),$$

where  $Diadema$  is the erosion caused by species in the genus  $Diadema$  at site  $i$  for individual  $n$ ,  $Echinometra$  is the erosion caused by species within the genus  $Echinometra$  at site  $i$  for individual  $n$ ,  $Other\ urchins$  is the erosion caused by echinoid species not in  $Echinometra$  or  $Diadema$ .  $Diadema$  was defined by a function from Januchowski-Hartley et al. (2017) as:

$$Diadema_{i,n} = (0.000001 * diameter_{i,n}^{3.42}) * 0.365 * 0.57 \quad (10),$$

where  $diameter$  is the diameter (cm) of the  $Diadema$  test. The function for  $Echinometra$  follows an equation from Januchowski-Hartley et al. 2017 and was defined as:

$$Echinometra_{i,n} = (0.0004 * diameter_{i,n}^{1.98}) * 0.365 * 0.57 \quad (11),$$

where  $diameter$  is the diameter (cm) of the  $Echinometra$  test.  $Other\ urchins$  also follows an equation from Januchowski-Hartley et al. (2017) and was defined as:

$$Other\ urchins_{i,n} = (0.0001 * diameter_{i,n}^{2.32}) * 0.365 * 0.57 \quad (12),$$

where  $diameter$  is the diameter (cm) of the echinoid test. We were particularly interested in the capacity of clinoid sponges to bioerode carbonate substrate, whereas other macroborers such as polychaetes, crustaceans, sipunculids, and molluscs (Glynn 1997) were more inconspicuous during our surveys. Therefore,  $macroboring$  was defined as:

$$macroboring_i = plamc_i * mec \quad (13),$$

where  $plamc$  is the mean planar cover of macroboring organisms for site  $i$ , and  $mec$  is a macroboring erosion constant, for which we use a conservative estimate of 10 kg CaCO<sub>3</sub> m<sup>-2</sup> y<sup>-1</sup> for clinoid sponges. We estimated that the positive contribution of sediment to carbonate production was no more than 0.4 kg CaCO<sub>3</sub> m<sup>-2</sup> y<sup>-1</sup> (Hubbard 1997).

We estimated carbonate production by solving equations (1) to (13) for each transect, and plotted the estimated rates of carbonate production across the spatial fields. We firstly used semivariograms to estimate the extent of spatial autocorrelation, and examined the spatial data for isotropy (i.e., directionality). We then used the information from the semivariograms, and the isotropy, to run a series of ordinary kriging analyses to interpolate the data across the spatial fields of both islands. To convert rates of carbonate production to vertical reef growth we used:

$$Vertical\ reef\ growth = Cp + Cp(Cp * alpha) \quad (14),$$

where  $Cp$  is carbonate production and  $alpha$  is an estimated coefficient (van Woesik and Cacciapaglia 2018).

## Palau

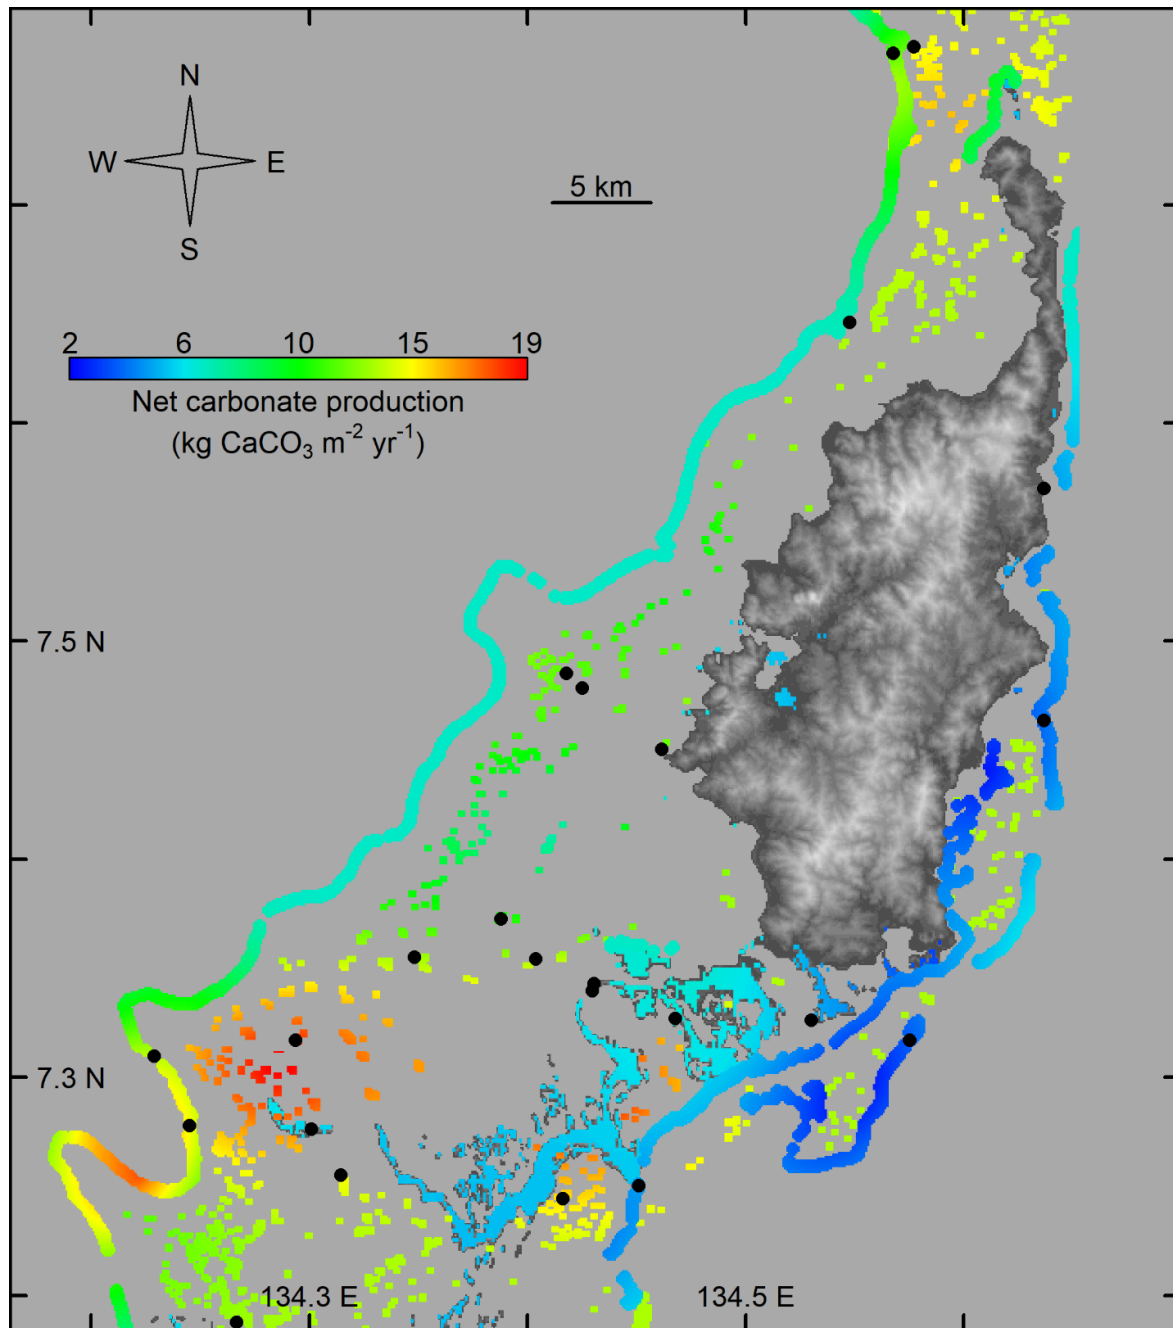

**Figure A.** Spatial kriging of the net shallow-water coral-reef carbonate production ( $\text{kg CaCO}_3 \text{ m}^{-2} \text{ yr}^{-1}$ ) from 24 sites in Palau, 2017. The kriged maps were generated in R (R Core Team, 2020) and the topography was generated using ‘elevatr’ in R (Hollister et al. 2020) using the source GL3 for OpenTopography's data from the Shuttle Radar Topography Mission GL3, <https://portal.opentopography.org/raster?opentopoID=OTSRTM.042013.4326.1>

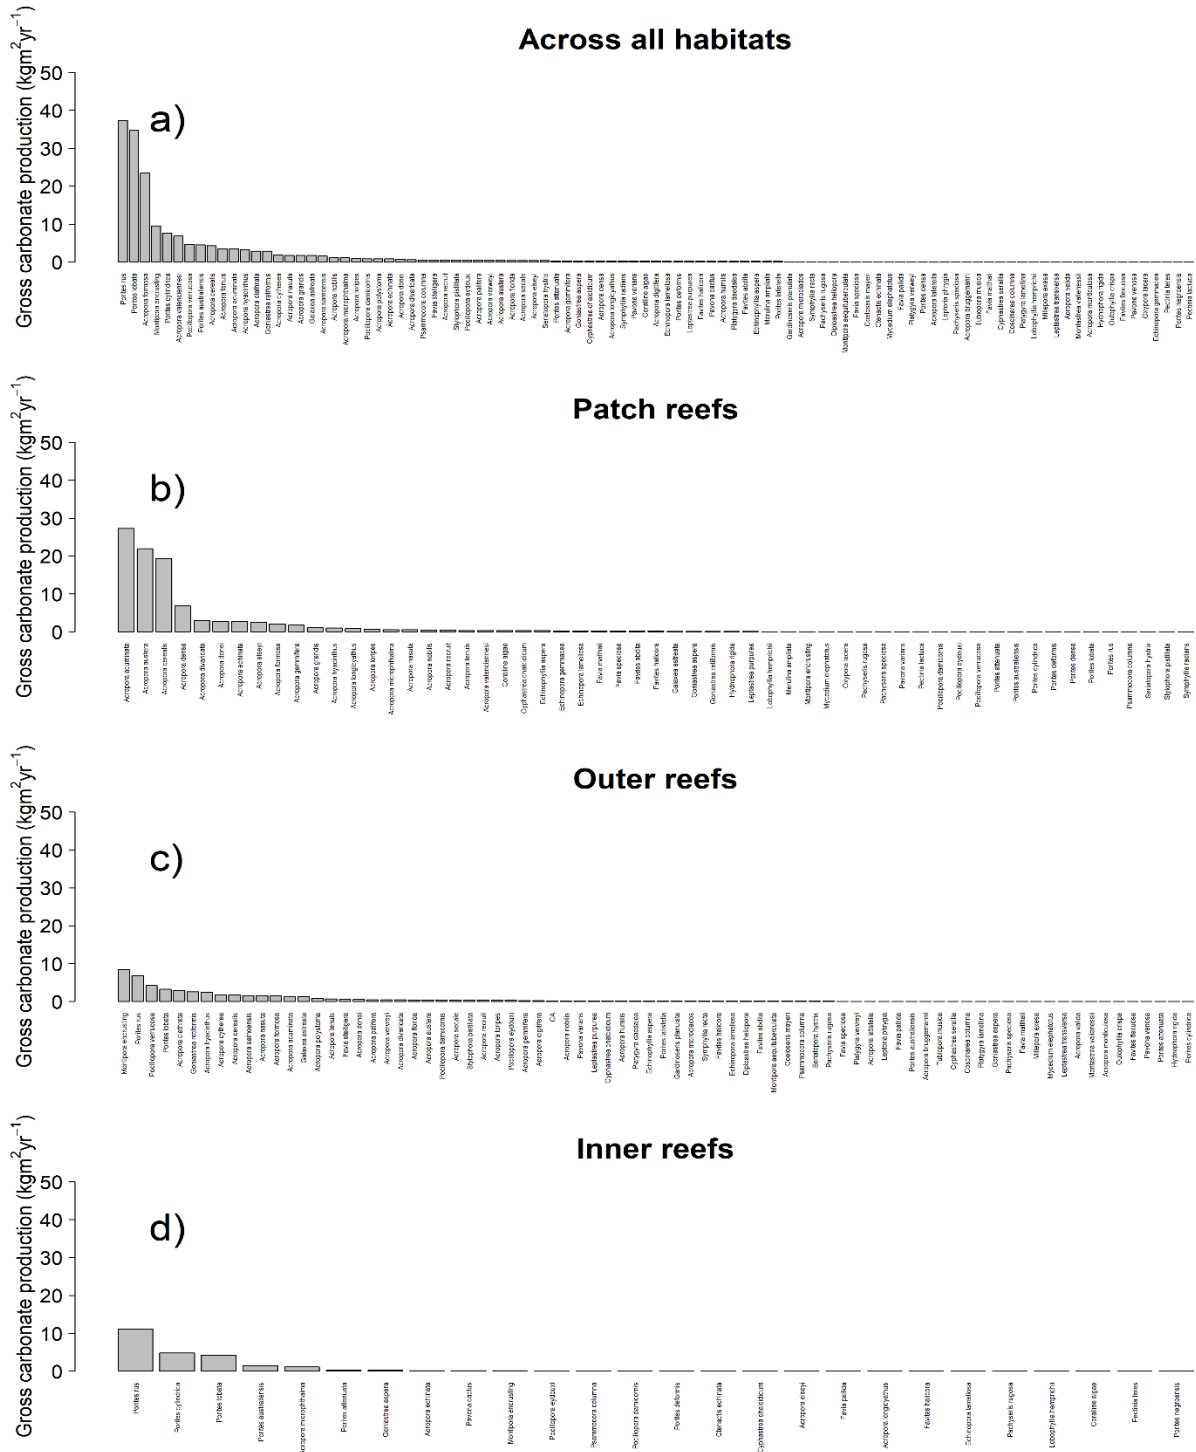

**Figure B.** Contribution of carbonate production ( $\text{kg CaCO}_3 \text{ m}^{-2} \text{ y}^{-1}$ ) by coral species, from 24 sites in Palau, 2017. Panel **a)** shows the contribution of species across all 24 sites, panel **b)** shows the contribution of species across the 10 patch reef sites, panel **c)** shows the contribution of

species across the 8 outer reef sites and panel **d**) shows the contribution of species across the 6 inner reef sites.

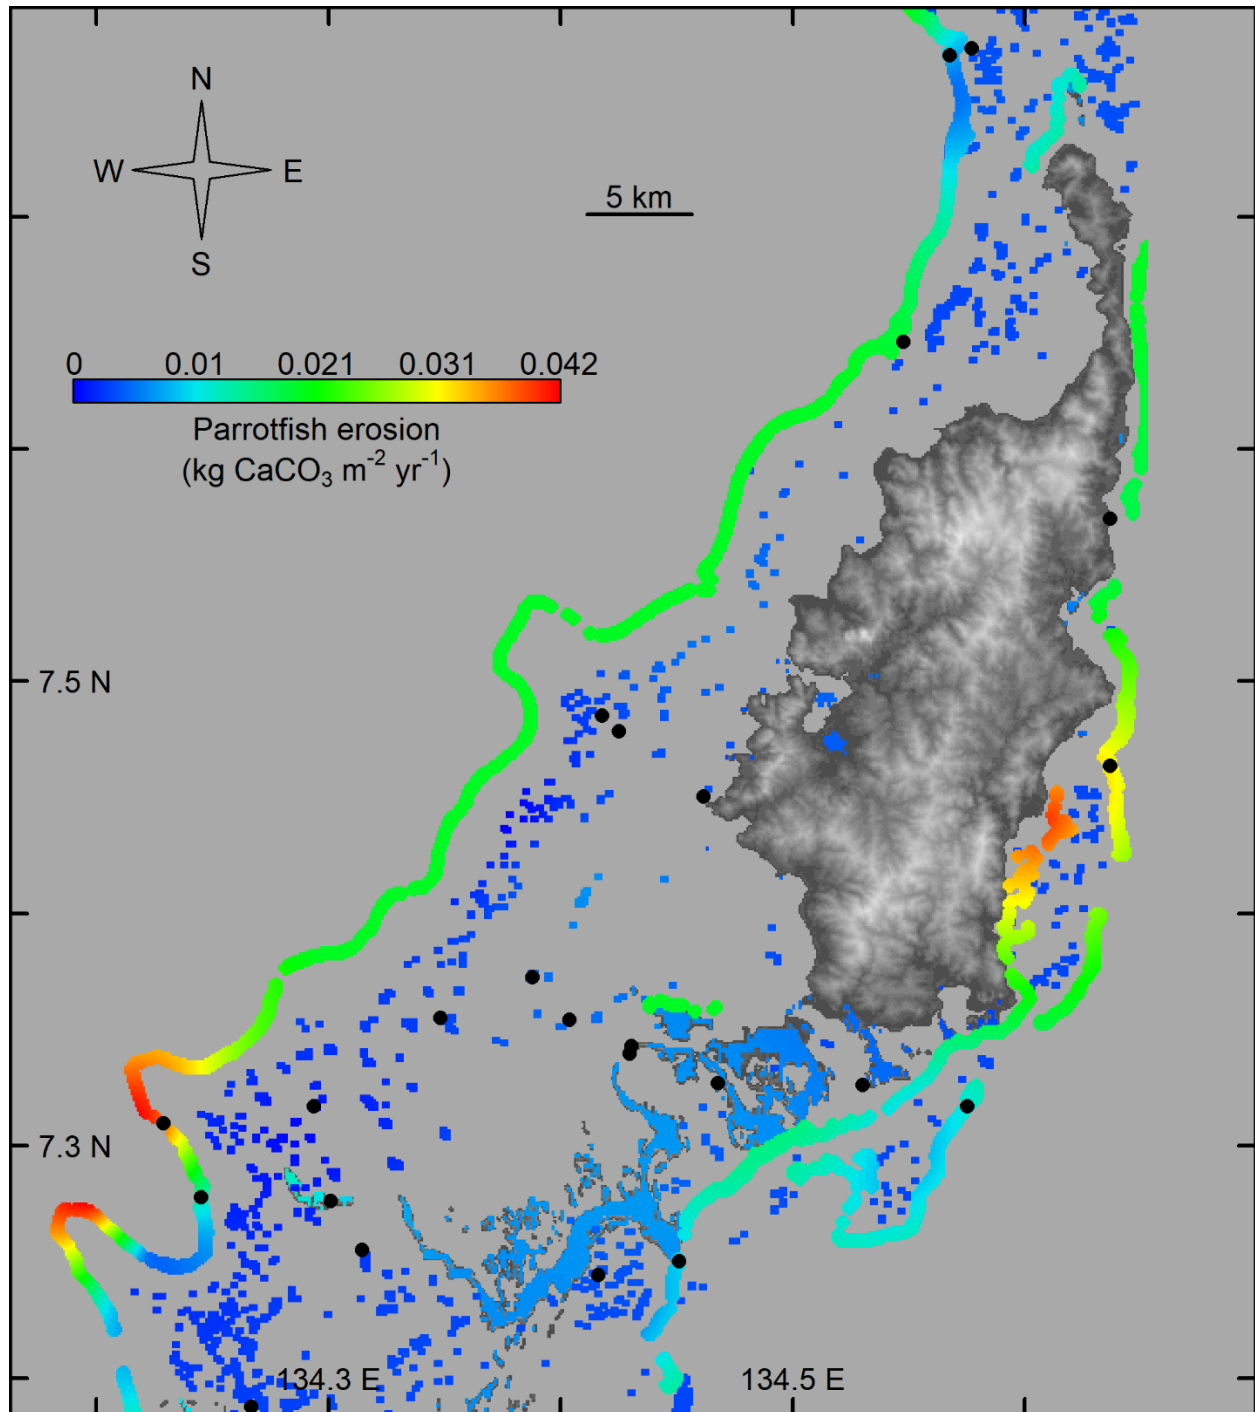

**Figure C.** Erosional estimates for parrotfishes ( $\text{kg CaCO}_3 \text{ m}^{-2} \text{ yr}^{-1}$ ) using spatial kriging for shallow-water coral-reef habitats (including inner, outer, and patch reefs), from 24 sites in Palau, 2017. The kriged maps were generated in R (R Core Team, 2020) and the topography was generated using ‘elevatr’ in R (Hollister et al. 2020) using the source GL3 for

OpenTopography's data from the Shuttle Radar Topography Mission GL3,  
<https://portal.opentopography.org/raster?opentopoID=OTSRTM.042013.4326.1>

## Yap

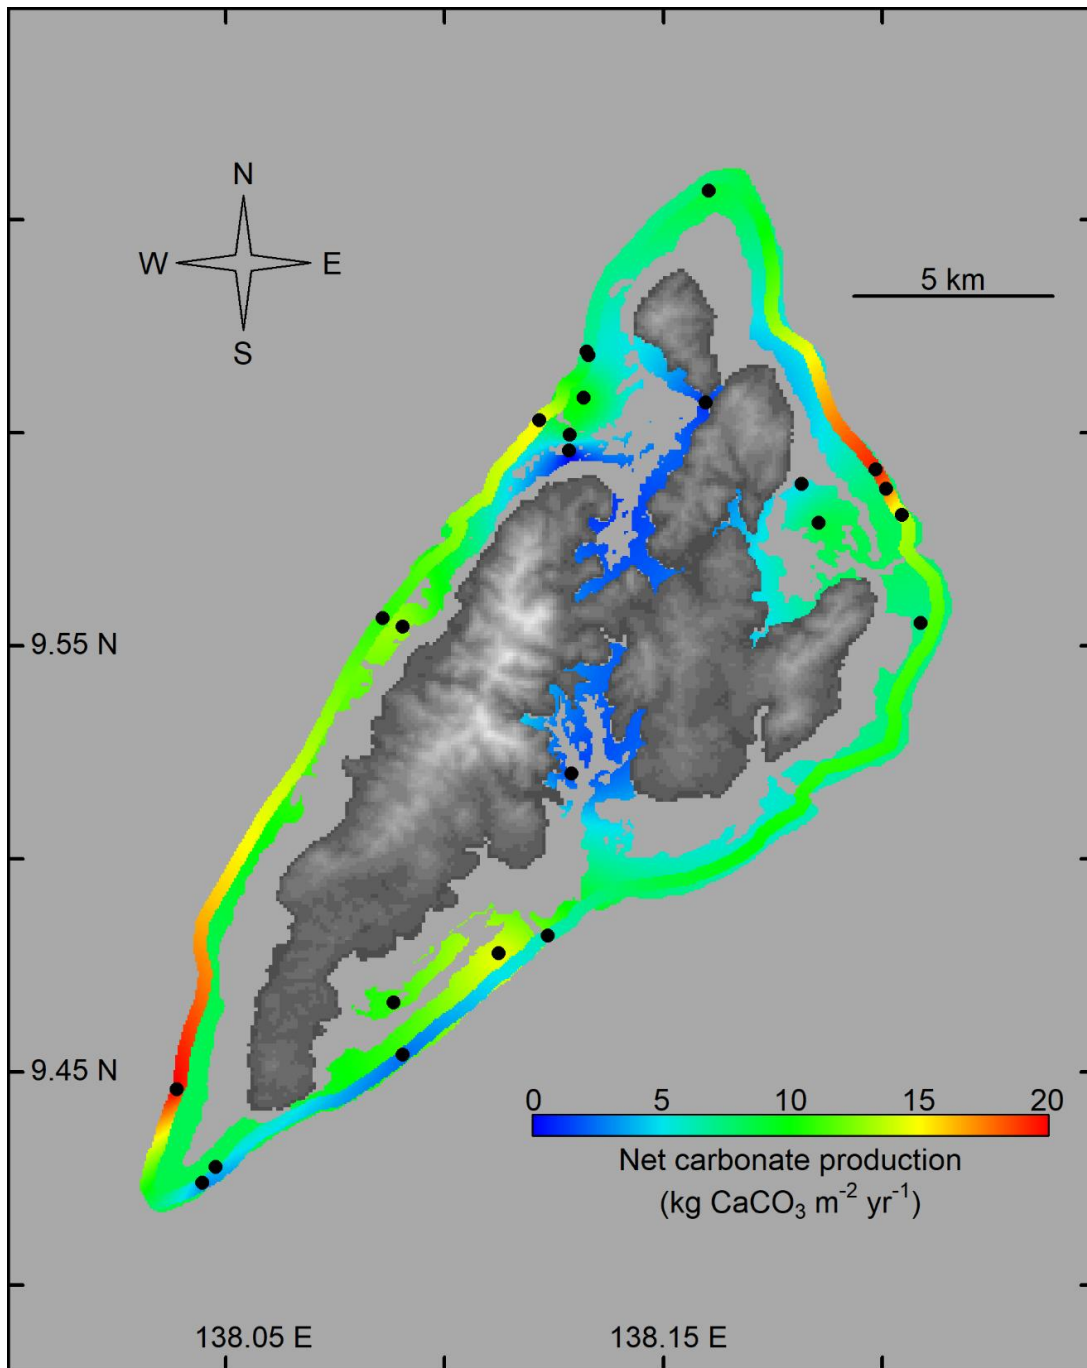

**Figure D.** Spatial kriging of the net shallow-water coral-reef carbonate production ( $\text{kg CaCO}_3 \text{ m}^{-2} \text{ yr}^{-1}$ ) from 24 sites in Yap, 2017. The kriged maps were generated in R (R Core Team, 2020) and the topography was generated using ‘elevatr’ in R (Hollister et al. 2020) using the source GL3 for OpenTopography's data from the Shuttle Radar Topography Mission GL3, <https://portal.opentopography.org/raster?opentopoID=OTSRTM.042013.4326.1>





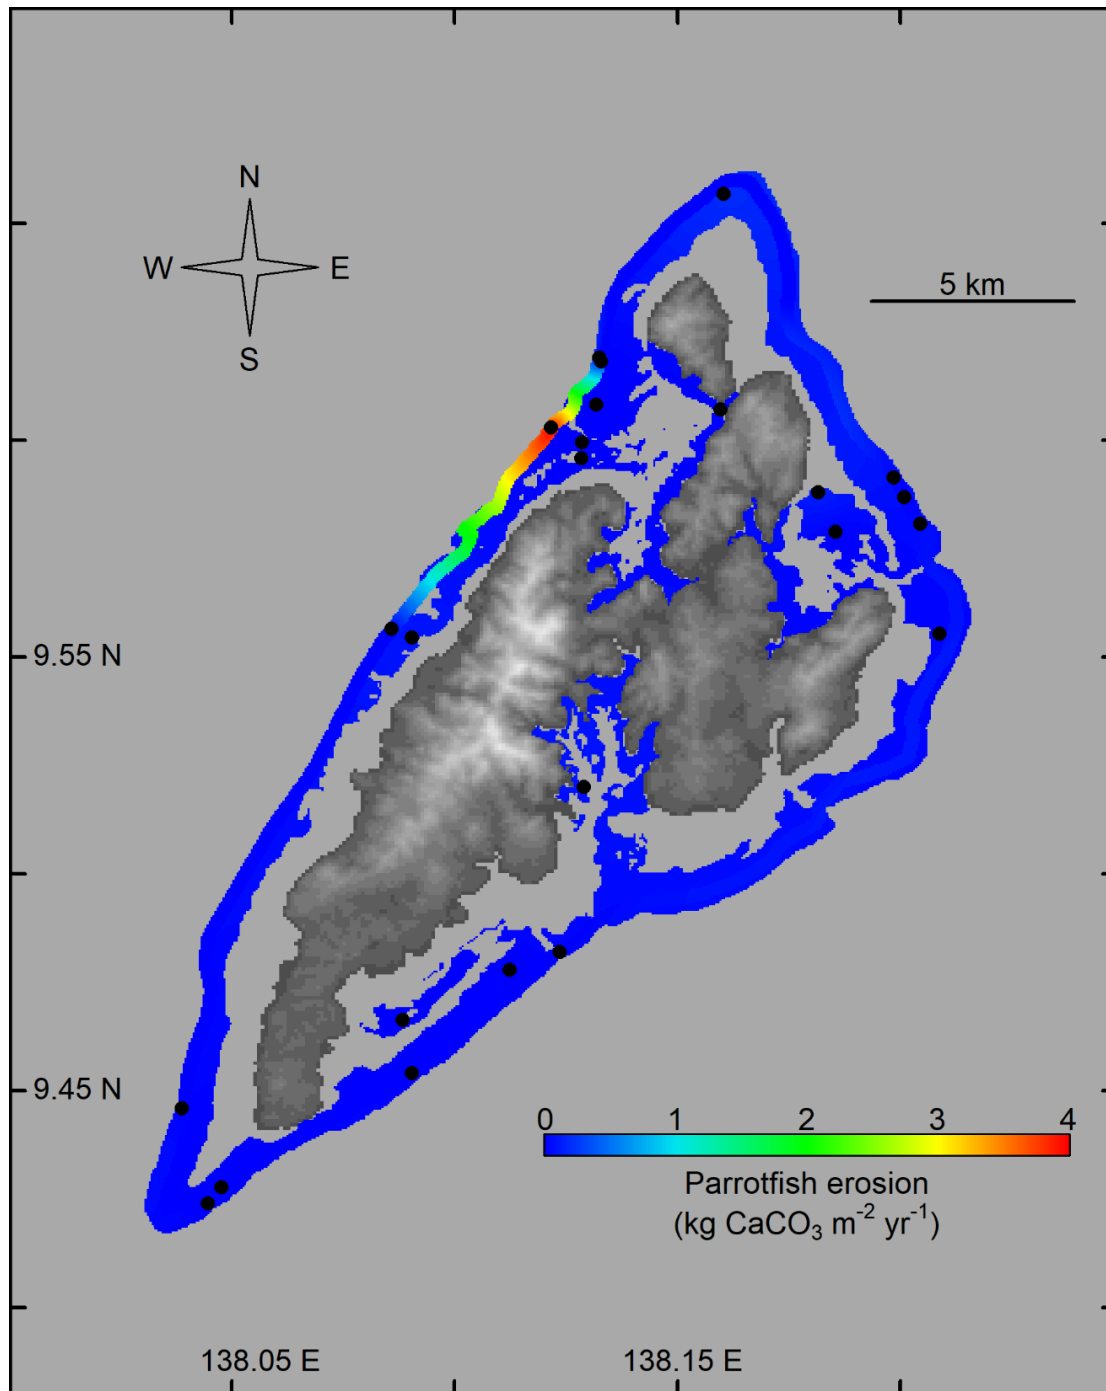

**Figure F.** Erosional estimates for parrotfishes ( $\text{kg CaCO}_3 \text{ m}^{-2} \text{ yr}^{-1}$ ) using spatial kriging for shallow-water coral-reef habitats (including inner, outer, and patch reefs) from 24 sites in Yap, 2017. The kriged maps were generated in R (R Core Team, 2020) and the topography was generated using ‘elevatr’ in R (Hollister et al. 2020) using the source GL3 for OpenTopography's data from the Shuttle Radar Topography Mission GL3, <https://portal.opentopography.org/raster?opentopoID=OTSRTM.042013.4326.1>

## Pohnpei

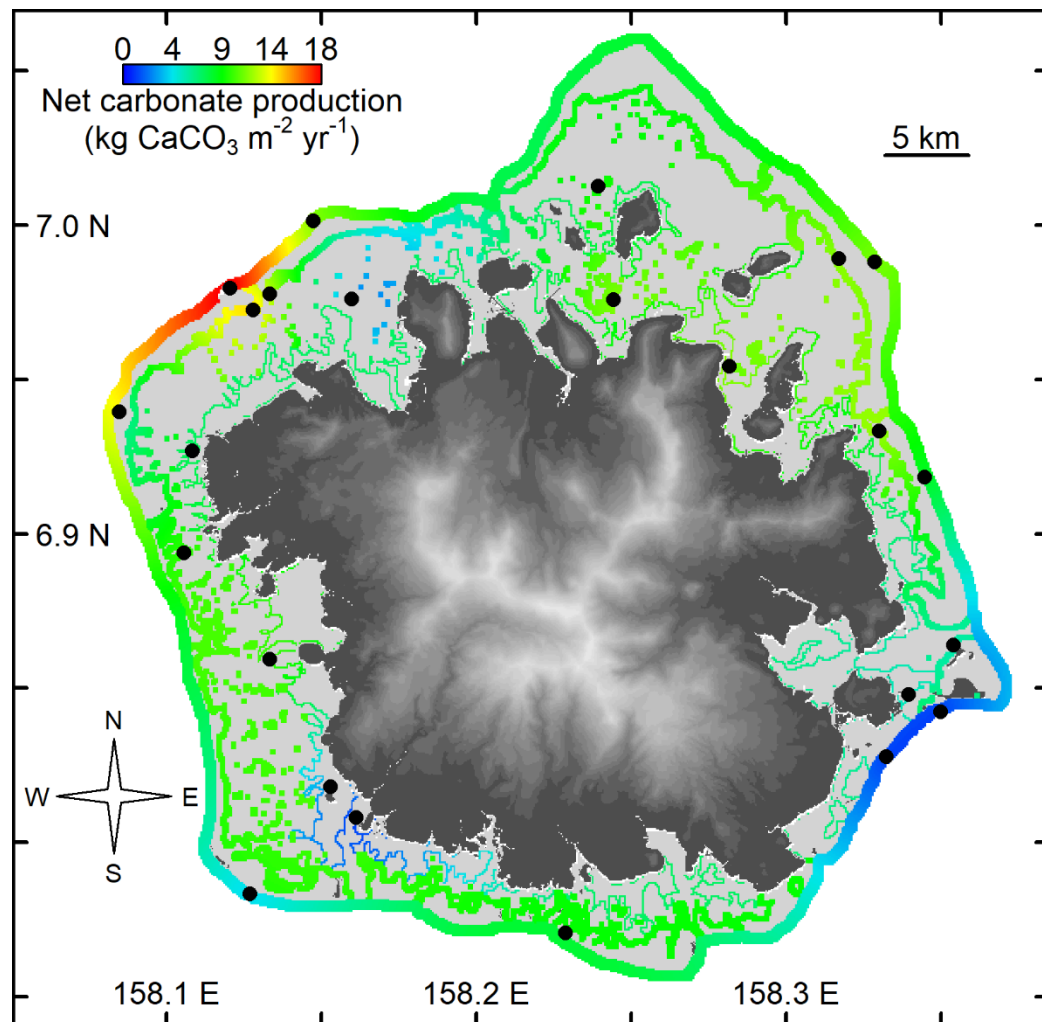

**Figure G.** Spatial kriging of the net shallow-water coral-reef carbonate production ( $\text{kg CaCO}_3 \text{ m}^{-2} \text{ yr}^{-1}$ ) from 24 sites in Pohnpei, 2018. The kriged maps were generated in R (R Core Team, 2020) and the topography was generated using ‘elevatr’ in R (Hollister et al. 2020) using the source GL3 for OpenTopography’s data from the Shuttle Radar Topography Mission GL3, <https://portal.opentopography.org/raster?opentopoID=OTSRTM.042013.4326.1>

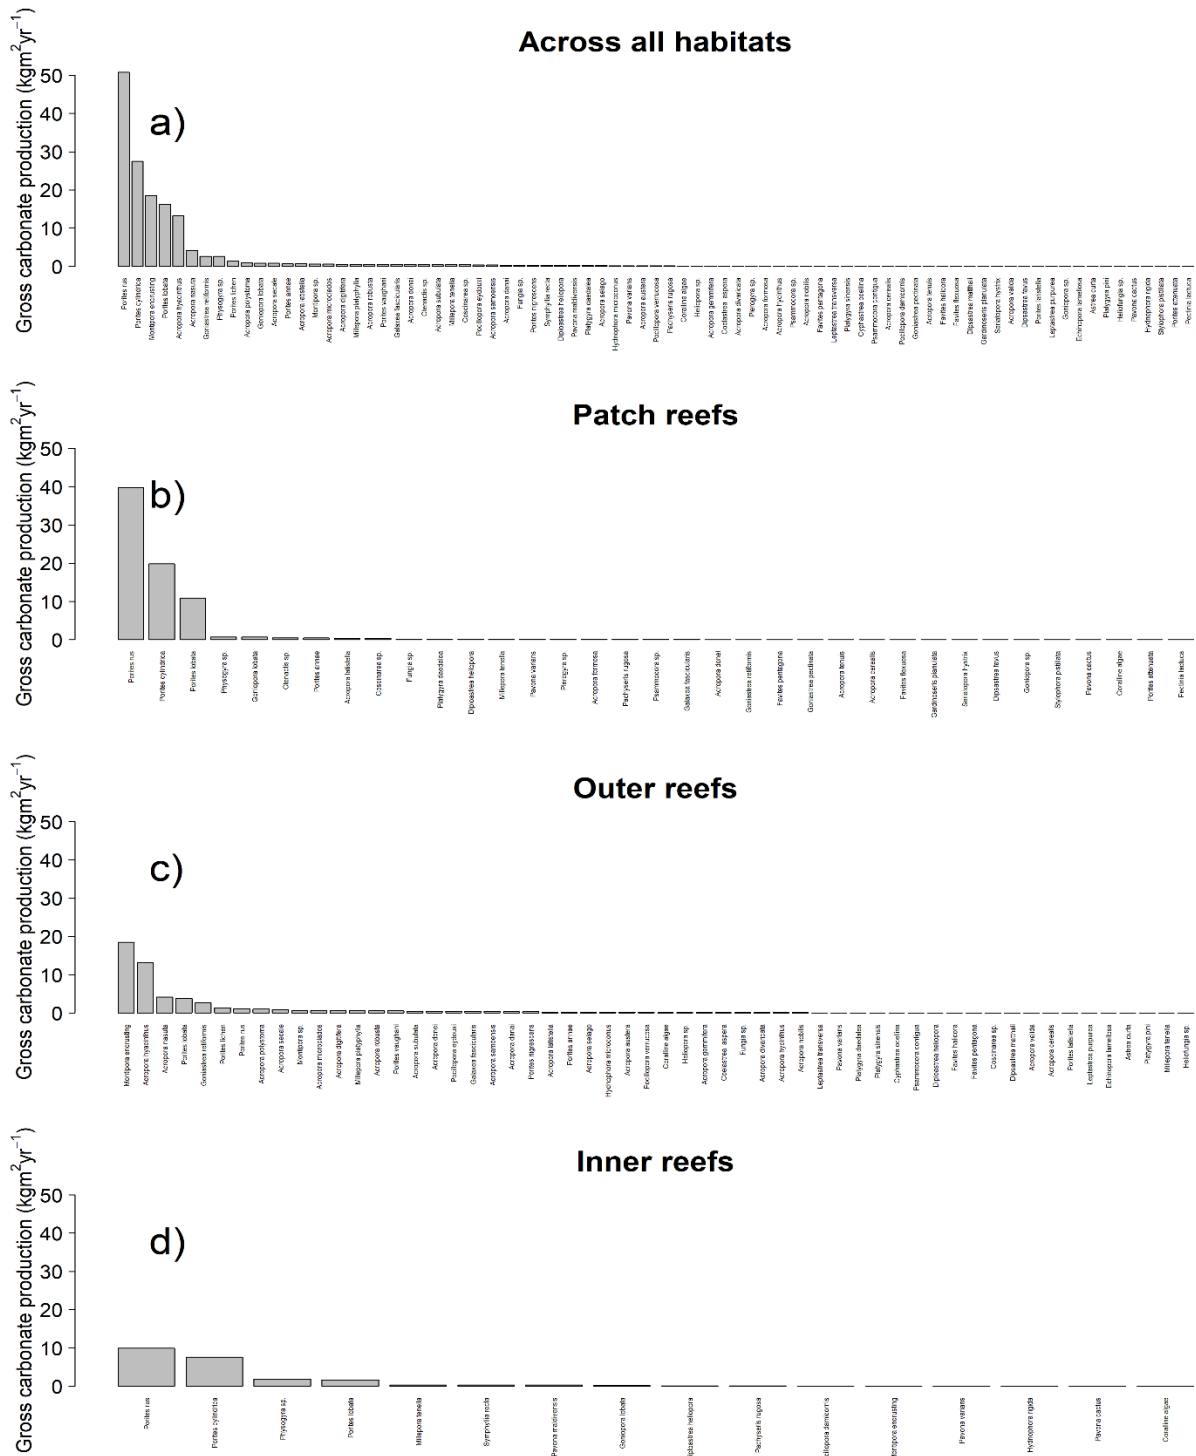

**Figure H.** Contribution of carbonate production ( $\text{kg CaCO}_3 \text{ m}^{-2} \text{ y}^{-1}$ ) by coral species from 24 sites in Pohnpei, 2018. Panel **a)** shows the contribution of species across all 24 sites, panel **b)** shows the contribution of species across the 11 patch reef sites, panel **c)** shows the contribution of species across the 8 outer reef sites and panel **d)** shows the contribution of species across the 5 inner reef sites.

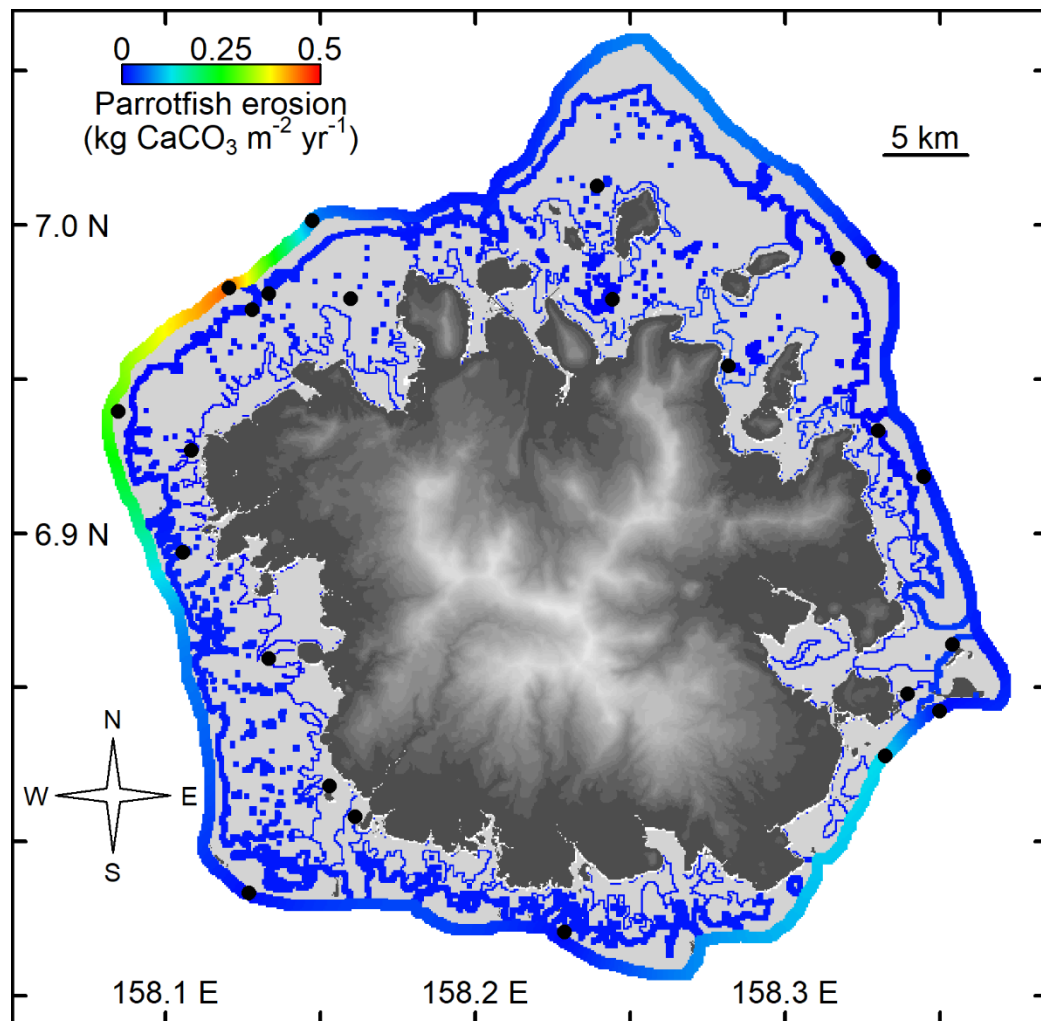

**Figure I.** Erosional estimates for parrotfishes ( $\text{kg CaCO}_3 \text{ m}^{-2} \text{ yr}^{-1}$ ) using spatial kriging for shallow-water coral-reef habitats (including inner, outer, and patch reefs) from 24 sites in Pohnpei, 2018. The kriged maps were generated in R (R Core Team, 2020) and the topography was generated using ‘elevatr’ in R (Hollister et al. 2020) using the source GL3 for OpenTopography’s data from the Shuttle Radar Topography Mission GL3, <https://portal.opentopography.org/raster?opentopoID=OTSRTM.042013.4326.1>

## Kosrae

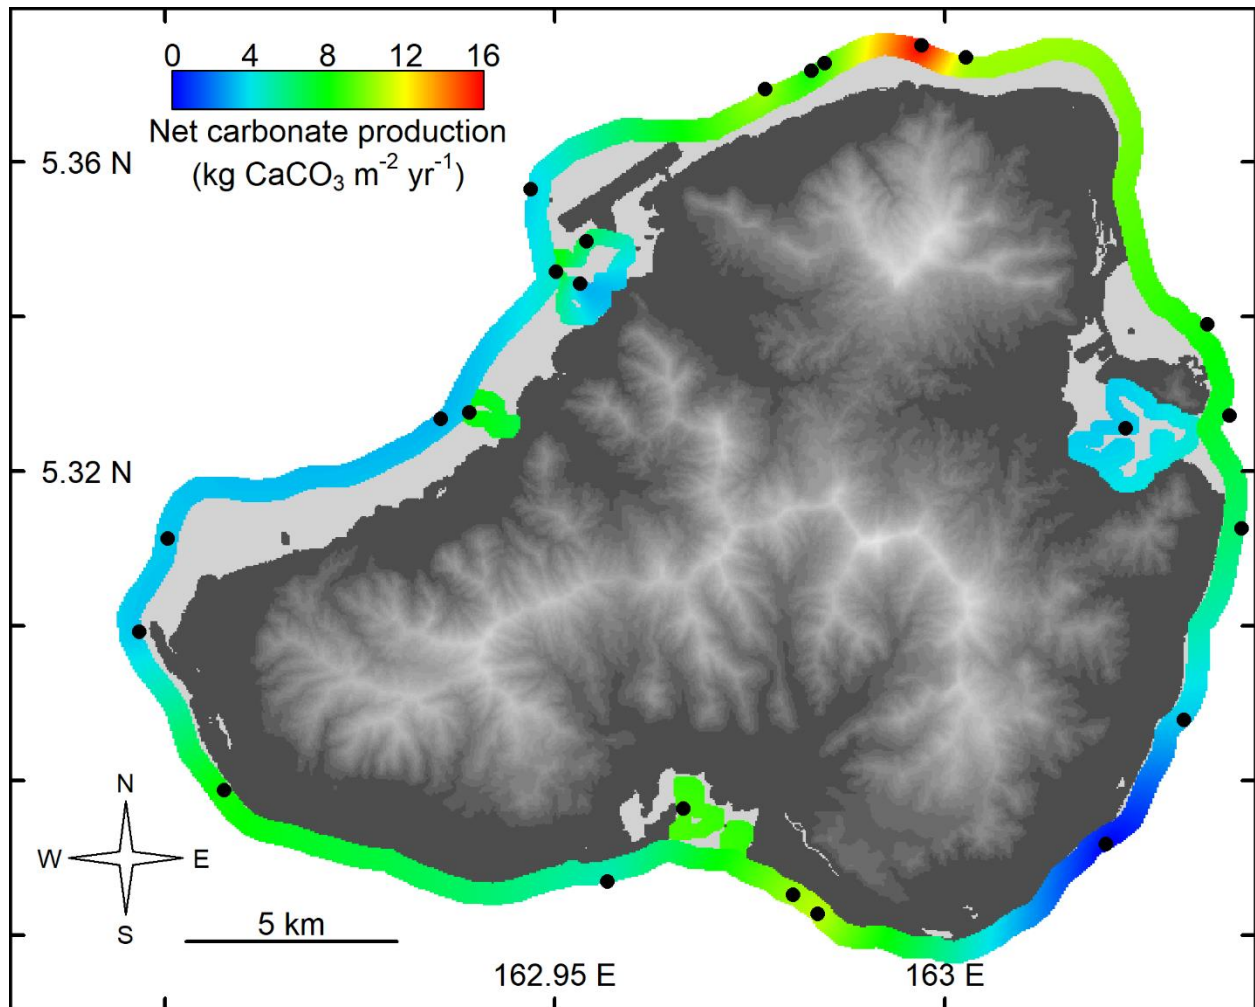

**Figure J.** Spatial kriging of the net shallow-water coral-reef carbonate production ( $\text{kg CaCO}_3 \text{ m}^{-2} \text{ yr}^{-1}$ ) from 24 sites in Kosrae, 2018. The kriged maps were generated in R (R Core Team, 2020) and the topography was generated using ‘elevatr’ in R (Hollister et al. 2020) using the source GL3 for OpenTopography’s data from the Shuttle Radar Topography Mission GL3, <https://portal.opentopography.org/raster?opentopoID=OTSRTM.042013.4326.1>

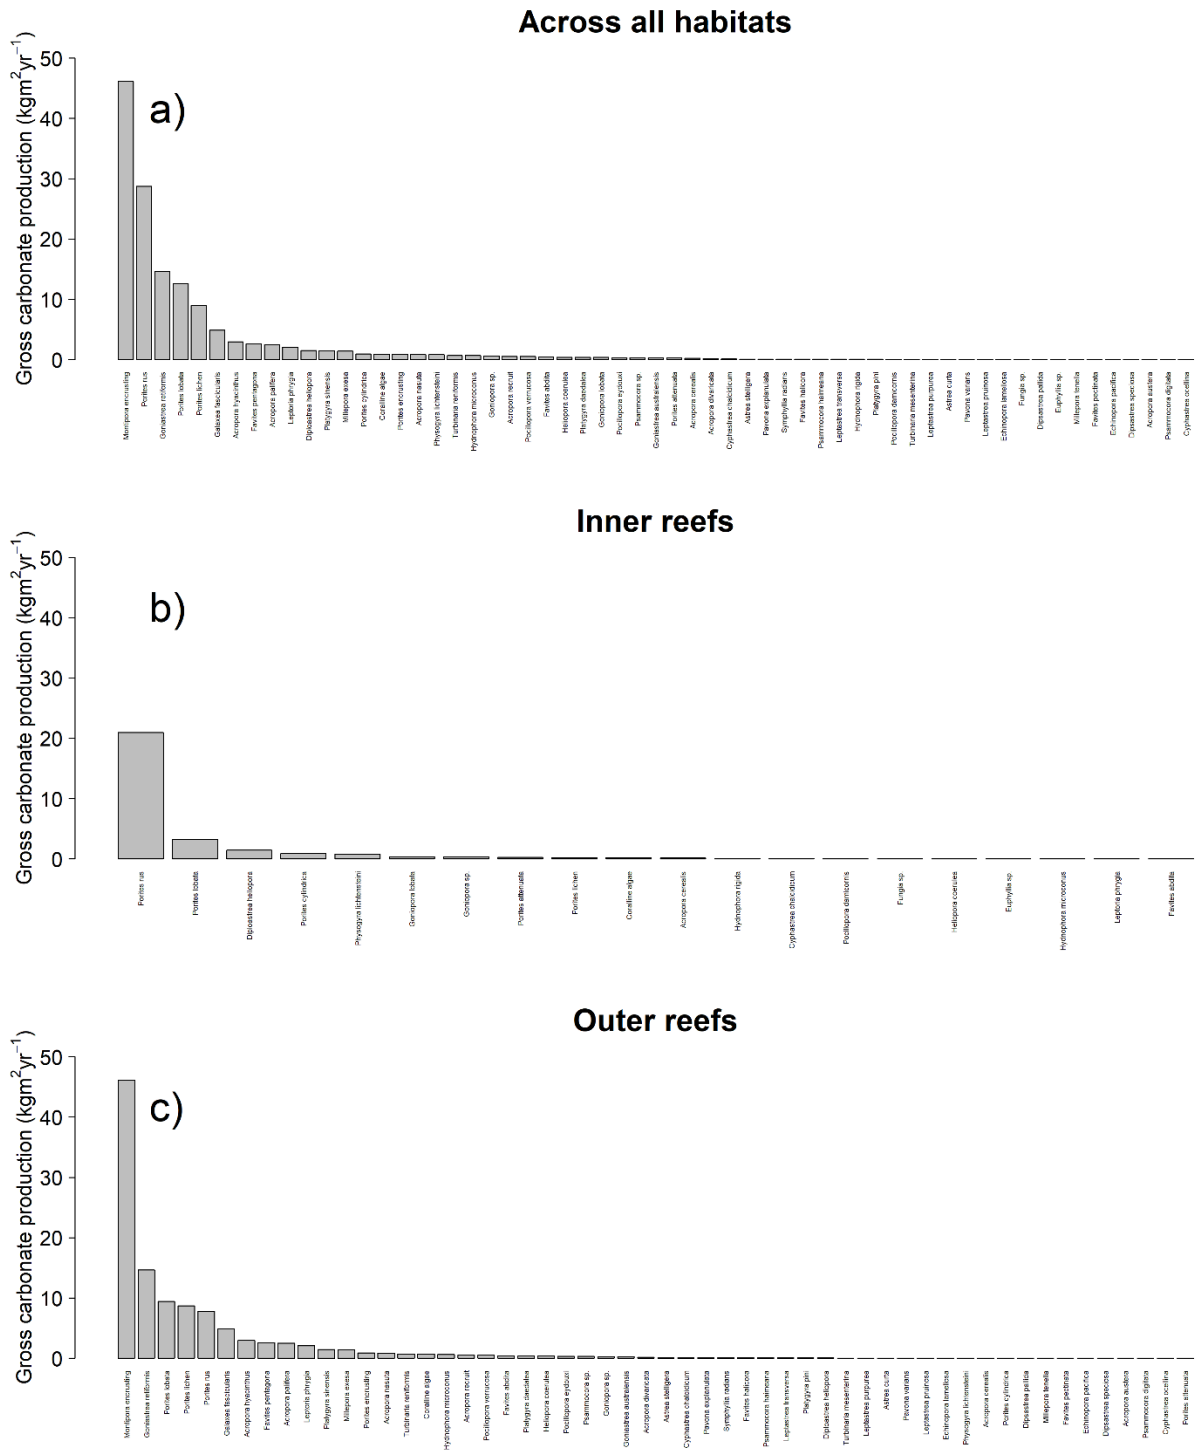

**Figure K.** Contribution of carbonate production ( $\text{kg CaCO}_3 \text{ m}^{-2} \text{ y}^{-1}$ ) by coral species from 24 sites in Kosrae, 2018. Panel **a)** shows the contribution of species across all 24 sites, panel **b)** shows the contribution of species across the 6 inner reef sites, and panel **c)** shows the contribution of species across the 18 outer reef sites.

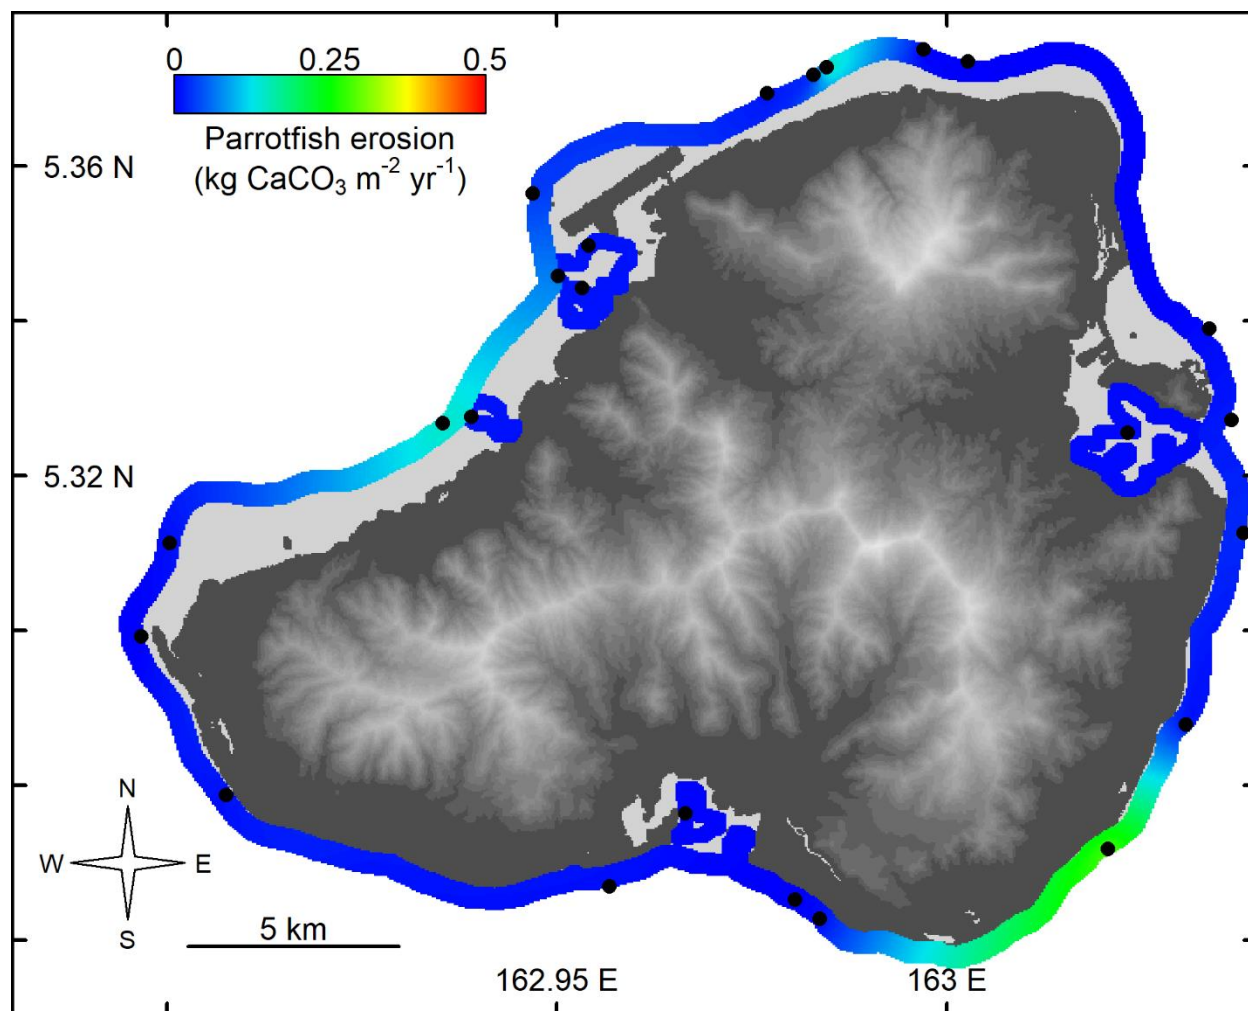

**Figure L.** Erosional estimates for parrotfishes (kg CaCO<sub>3</sub> m<sup>-2</sup> yr<sup>-1</sup>) using spatial kriging for shallow-water coral-reef habitats (including inner, outer, and patch reefs) from 24 sites in Kosrae, 2018. The kriged maps were generated in R (R Core Team, 2020) and the topography was generated using ‘elevatr’ in R (Hollister et al. 2020) using the source GL3 for OpenTopography's data from the Shuttle Radar Topography Mission GL3, <https://portal.opentopography.org/raster?opentopoID=OTSRTM.042013.4326.1>

## Majuro

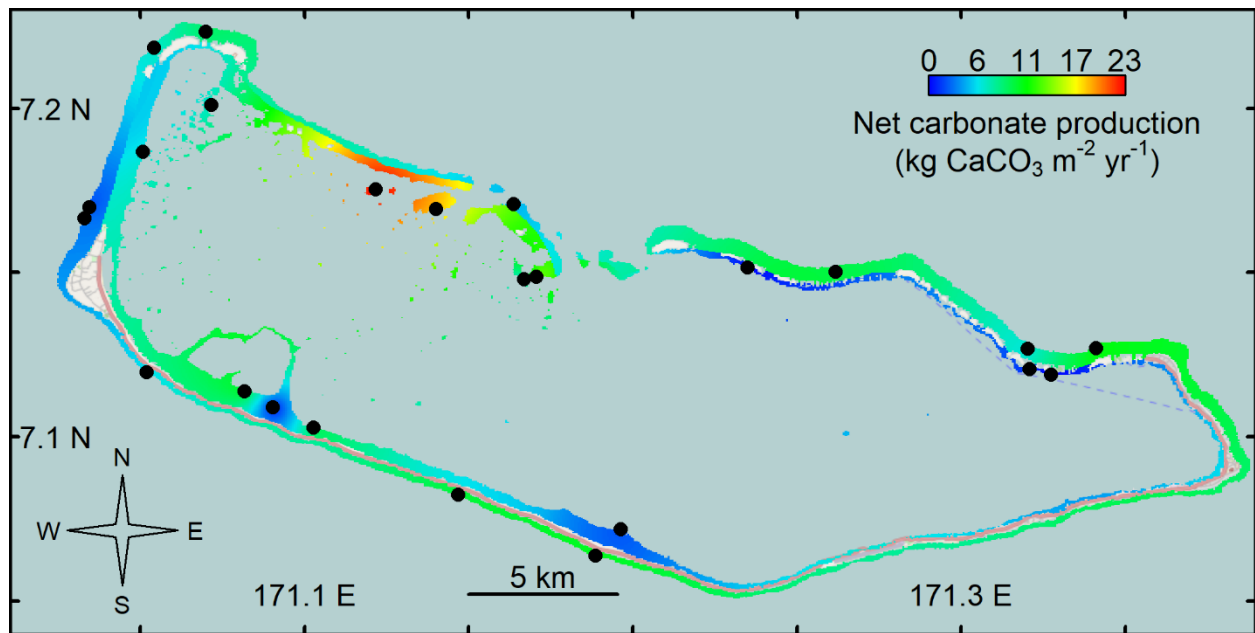

**Figure M.** Spatial kriging of the net shallow-water coral-reef carbonate production ( $\text{kg CaCO}_3 \text{ m}^{-2} \text{ yr}^{-1}$ ) from 24 sites in Majuro, 2019. The outline of the atoll was derived from <https://www.openstreetmap.org/>. The maps were generated in R (R Core Team, 2020).





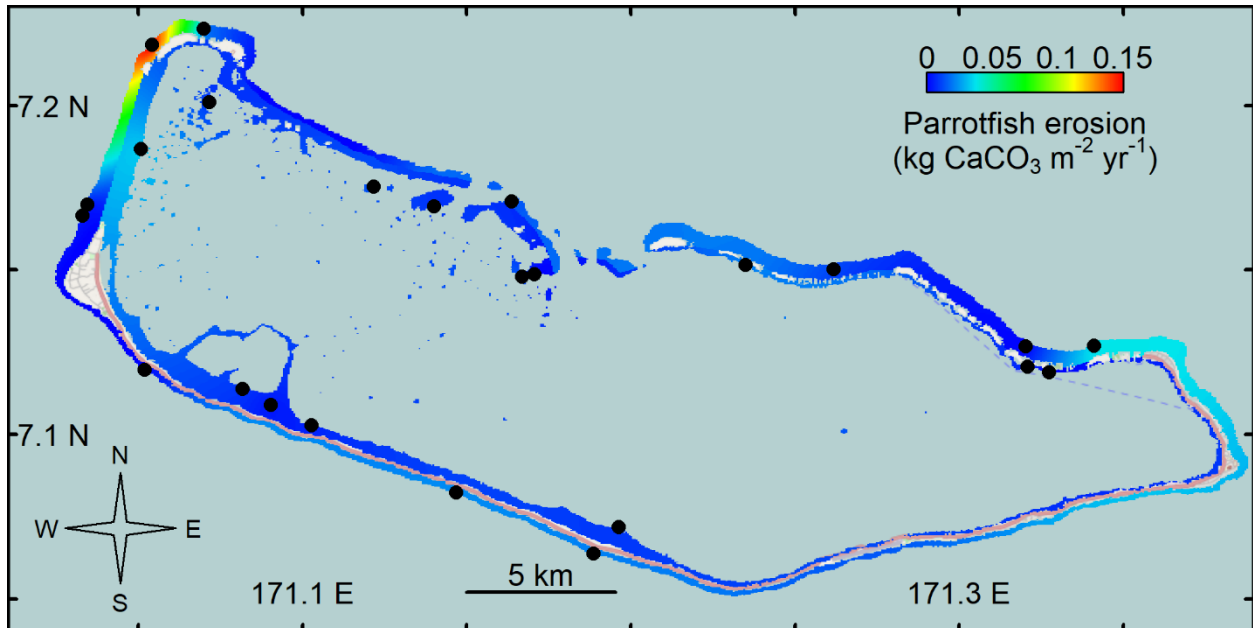

**Figure O.** Erosional estimates for parrotfishes ( $\text{kg CaCO}_3 \text{ m}^{-2} \text{ yr}^{-1}$ ) using spatial kriging for shallow-water coral-reef habitats (including outer, and patch reefs) from 24 sites in Majuro, 2019. The outline of the atoll was derived from <https://www.openstreetmap.org/>. The maps were generated in R (R Core Team, 2020).

## Kiritimati

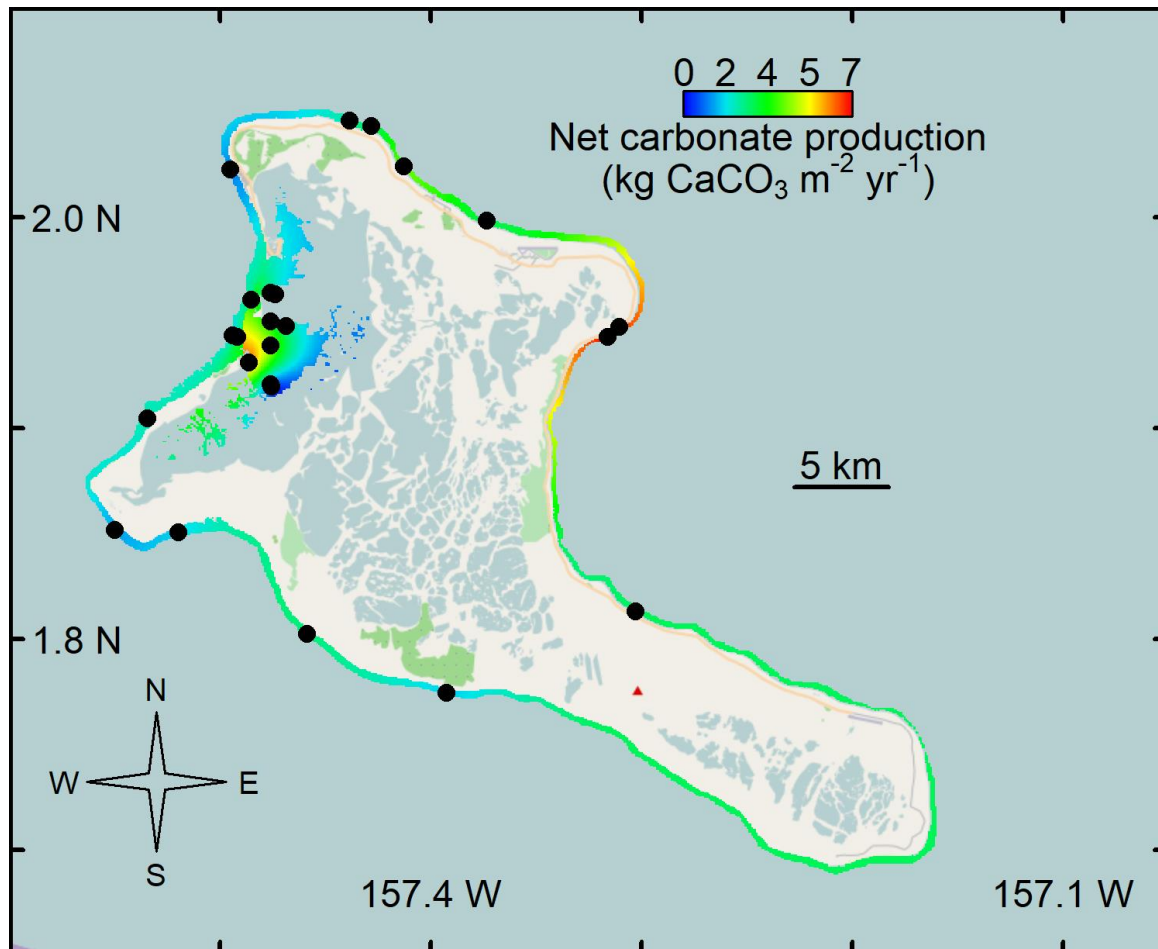

**Figure P.** Spatial kriging of the net shallow-water coral-reef carbonate production (kg CaCO<sub>3</sub> m<sup>-2</sup> yr<sup>-1</sup>) from 22 sites in Kiritimati, 2019. Note that the eastern reefs of Kiritimati were only lightly surveyed because of inclement ocean conditions. The outline and details of the atoll were derived from <https://www.openstreetmap.org/>. The maps were generated in R (R Core Team, 2020).

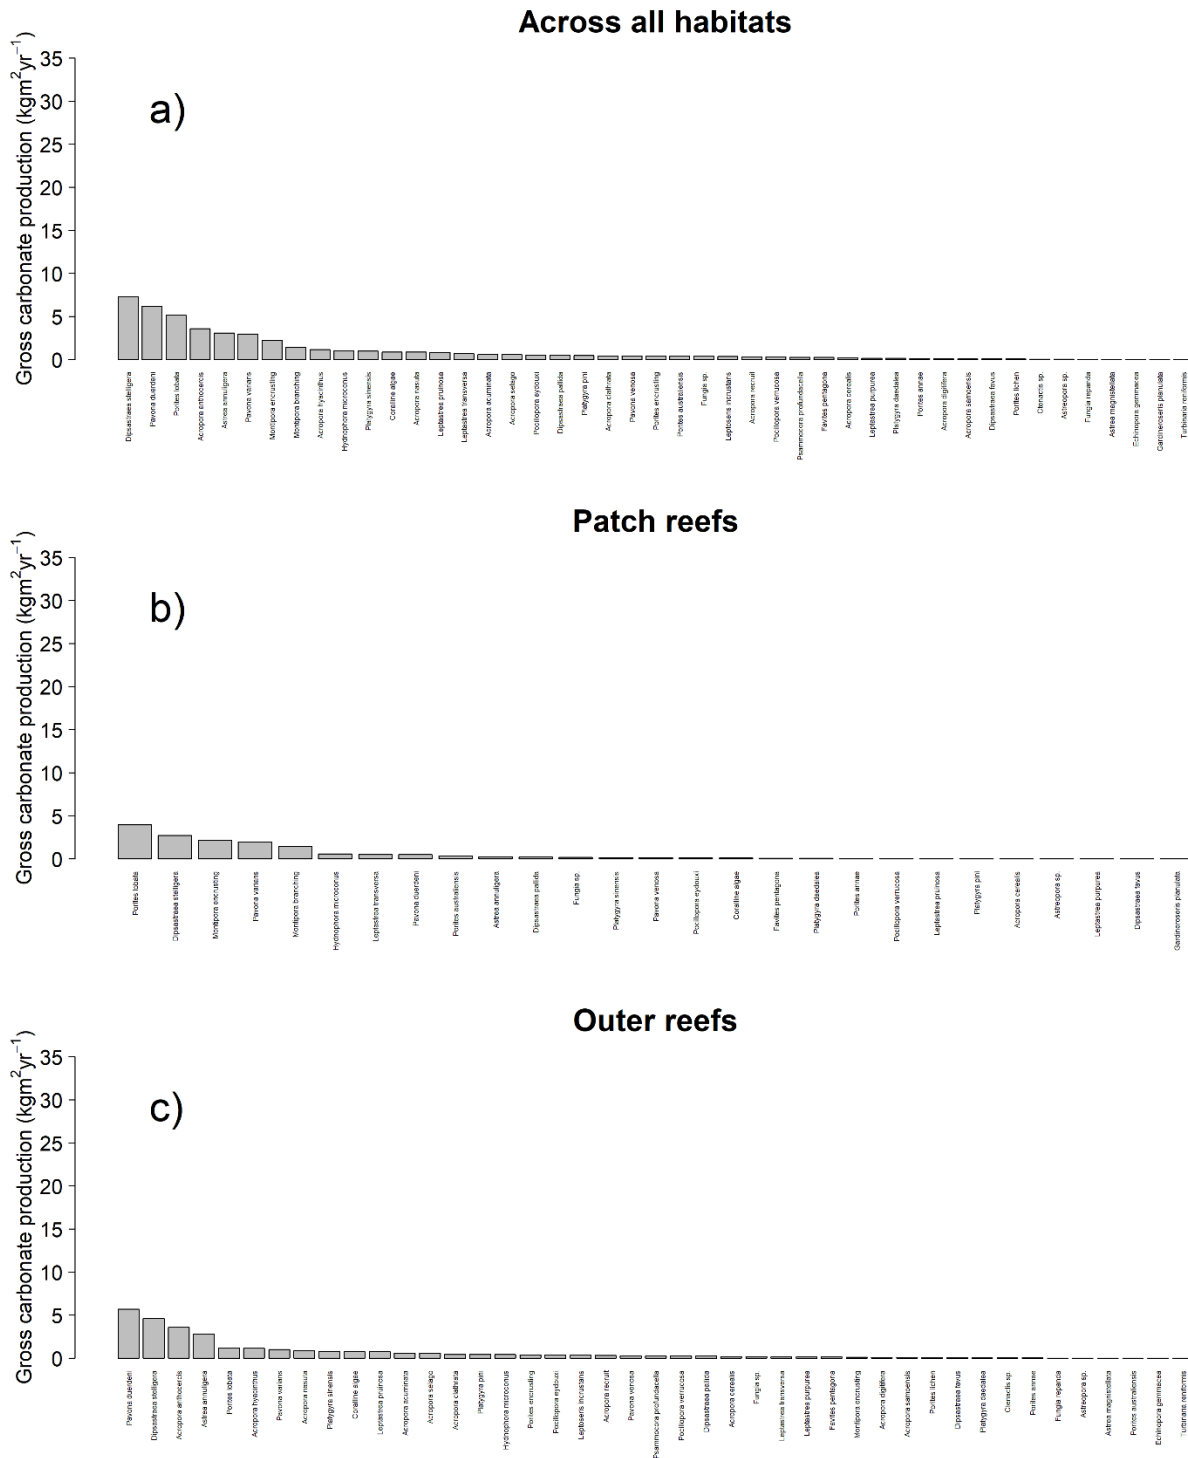

**Figure Q.** Contribution of carbonate production ( $\text{kg CaCO}_3 \text{ m}^{-2} \text{ y}^{-1}$ ) by coral species from 22 sites in Kiritimati, 2019. Panel **a)** shows the contribution of species across all 22 sites, panel **b)** shows the contribution of species across the 8 patch reef sites, and panel **c)** shows the contribution of species across the 14 outer reef sites.

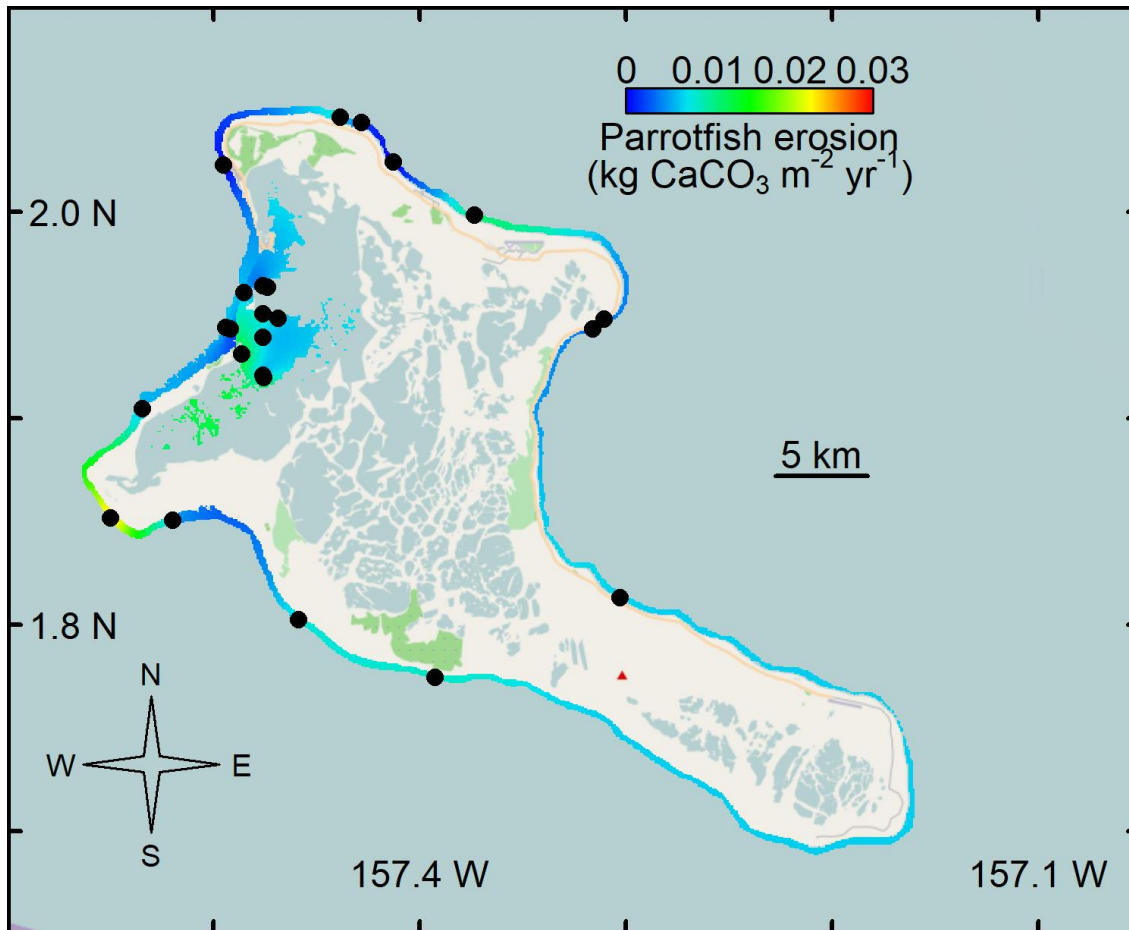

**Figure R.** Erosional estimates for parrotfishes ( $\text{kg CaCO}_3 \text{ m}^{-2} \text{ yr}^{-1}$ ) using spatial kriging for shallow-water coral-reef habitats (including inner, outer, and patch reefs) from 22 sites in Kiritimati, 2019. Note that the eastern reefs of Kiritimati were only lightly surveyed because of inclement ocean conditions. The outline and details of the atoll were derived from <https://www.openstreetmap.org/>. The maps were generated in R (R Core Team, 2020).

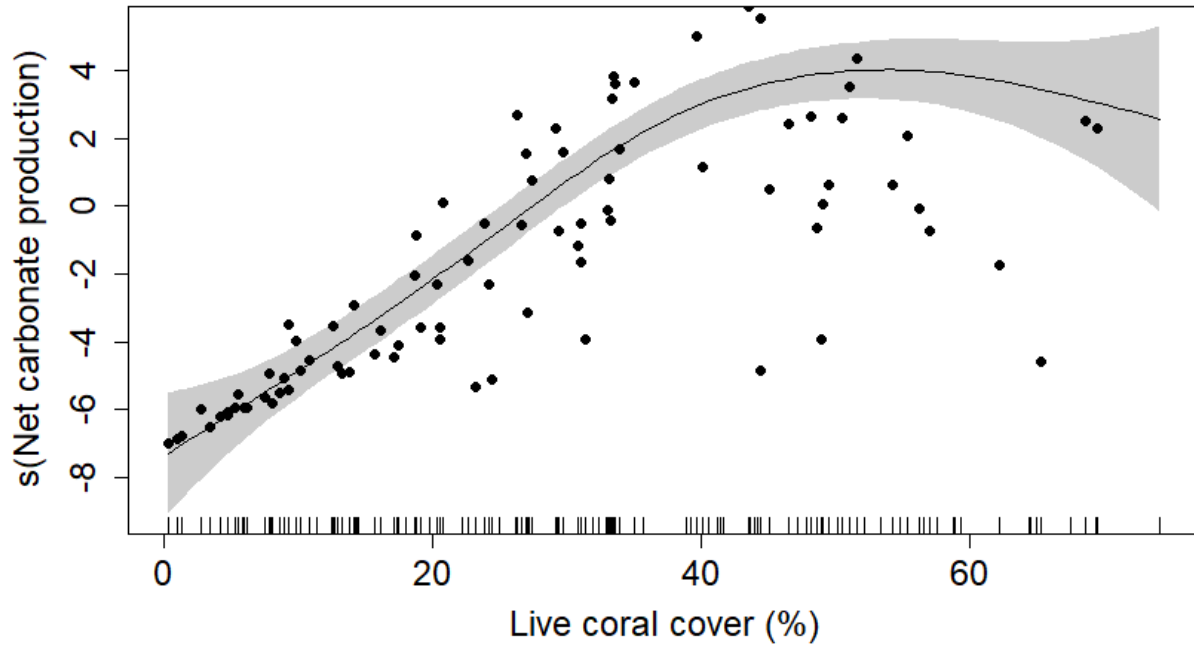

**Figure S.** Generalized additive model examining the relationship between live coral cover and net carbonate production at all 142 sites across the western and central tropical Pacific Ocean. Where the shading represents the 95% confidence intervals,  $s$  represents the smoothing function, and the rug plots represent the raw data. Twenty-four of the 142 sites were located in the western Pacific Ocean at each of Palau and Yap in 2017, 24 sites were located progressively further east at each of Pohnpei and Kosrae in 2018, and at Majuro in 2019, and 22 sites were located in the central Pacific Ocean at Kiritimati in 2019.

SLOO with number of iterations = 20

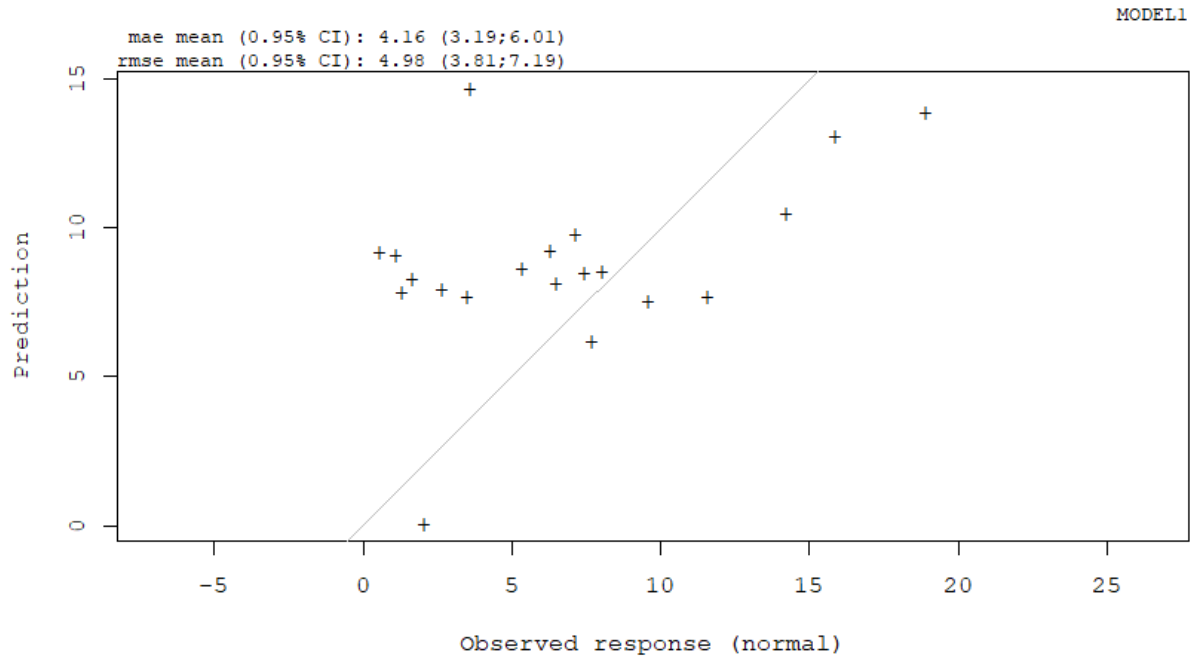

**Figure T.** Spatial cross-validation using spatial leave-one-out cross validation, comparing the observed response of carbonate production against the predicted response of carbonate production using INLAutils (Lucas et al. 2020) for all 142 sites across the western and central tropical Pacific Ocean, and where the identity function (i.e.,  $y=x$ ) is depicted by the line.

**Table 1:** Site locations and corresponding model output mean and standard deviation (SD) including Live Coral Cover (LCC), gross production, net production, bioerosion and rugosity.

| Island     | Site | Reef location | Mean LCC | SD LCC  | Latitude | Longitude | Mean gross production | SD gross production | Mean net production | SD net production | Mean bioerosion | SD bioerosion | Mean rugosity | SD rugosity |
|------------|------|---------------|----------|---------|----------|-----------|-----------------------|---------------------|---------------------|-------------------|-----------------|---------------|---------------|-------------|
| Kiritimati | 1    | outer         | 61.667   | 25.727  | 1.852    | -157.550  | 1.149                 | 0.513               | 1.161               | 0.518             | 0.045           | 0.018         | 1.083         | 0.055       |
| Kiritimati | 2    | outer         | 80.333   | 51.087  | 1.944    | -157.494  | 1.274                 | 0.700               | 1.299               | 0.686             | 0.032           | 0.030         | 1.131         | 0.084       |
| Kiritimati | 3    | outer         | 126.500  | 19.066  | 1.905    | -157.535  | 1.895                 | 0.624               | 1.931               | 0.622             | 0.021           | 0.011         | 1.188         | 0.130       |
| Kiritimati | 4    | outer         | 197.333  | 126.168 | 1.944    | -157.316  | 6.637                 | 4.692               | 6.681               | 4.691             | 0.014           | 0.004         | 1.057         | 0.088       |
| Kiritimati | 5    | outer         | 101.667  | 57.933  | 2.046    | -157.439  | 2.194                 | 1.196               | 2.233               | 1.205             | 0.018           | 0.020         | 1.149         | 0.076       |
| Kiritimati | 6    | outer         | 144.500  | 60.596  | 1.999    | -157.374  | 2.802                 | 1.312               | 2.843               | 1.310             | 0.017           | 0.008         | 1.098         | 0.045       |
| Kiritimati | 7    | outer         | 79.500   | 49.581  | 1.775    | -157.393  | 1.280                 | 0.860               | 1.322               | 0.861             | 0.015           | 0.009         | 1.058         | 0.046       |
| Kiritimati | 8    | outer         | 74.833   | 39.872  | 1.851    | -157.520  | 1.429                 | 0.894               | 1.467               | 0.893             | 0.019           | 0.013         | 1.071         | 0.038       |
| Kiritimati | 9    | outer         | 171.667  | 90.266  | 2.043    | -157.428  | 2.623                 | 1.890               | 2.650               | 1.889             | 0.030           | 0.006         | 1.139         | 0.062       |
| Kiritimati | 10   | outer         | 113.667  | 40.727  | 1.803    | -157.459  | 2.631                 | 1.133               | 2.674               | 1.137             | 0.015           | 0.009         | 1.179         | 0.016       |
| Kiritimati | 11   | outer         | 47.333   | 41.157  | 2.023    | -157.495  | 0.990                 | 0.999               | 1.031               | 0.998             | 0.016           | 0.008         | 1.236         | 0.098       |
| Kiritimati | 12   | outer         | 179.500  | 73.571  | 2.025    | -157.413  | 4.008                 | 2.641               | 4.047               | 2.635             | 0.018           | 0.015         | 1.110         | 0.043       |
| Kiritimati | 13   | outer         | 161.333  | 55.186  | 1.944    | -157.492  | 3.393                 | 0.893               | 3.446               | 0.894             | 0.004           | 0.003         | 1.315         | 0.051       |
| Kiritimati | 14   | outer         | 129.000  | 55.674  | 1.961    | -157.485  | 2.337                 | 1.303               | 2.386               | 1.306             | 0.009           | 0.009         | 1.243         | 0.135       |
| Kiritimati | 15   | patch         | 9.833    | 11.940  | 1.921    | -157.476  | 0.169                 | 0.190               | 0.226               | 0.190             | 0.000           | 0.000         | 1.015         | 0.009       |
| Kiritimati | 16   | patch         | 297.500  | 88.652  | 1.940    | -157.476  | 4.093                 | 1.476               | 4.140               | 1.473             | 0.010           | 0.007         | 1.158         | 0.129       |
| Kiritimati | 17   | patch         | 92.833   | 38.768  | 1.964    | -157.474  | 1.639                 | 0.572               | 1.693               | 0.574             | 0.003           | 0.004         | 1.138         | 0.048       |
| Kiritimati | 18   | patch         | 143.000  | 27.210  | 1.965    | -157.476  | 1.998                 | 0.432               | 2.048               | 0.432             | 0.008           | 0.003         | 1.107         | 0.071       |
| Kiritimati | 19   | patch         | 174.500  | 77.400  | 1.951    | -157.476  | 2.954                 | 1.755               | 3.002               | 1.759             | 0.009           | 0.004         | 1.230         | 0.150       |
| Kiritimati | 20   | patch         | 414.333  | 77.397  | 1.931    | -157.487  | 6.457                 | 2.259               | 6.507               | 2.256             | 0.007           | 0.005         | 1.216         | 0.049       |
| Kiritimati | 21   | patch         | 132.500  | 43.666  | 1.949    | -157.469  | 2.118                 | 0.940               | 2.171               | 0.940             | 0.004           | 0.002         | 1.248         | 0.148       |
| Kiritimati | 22   | patch         | 3.167    | 5.154   | 1.920    | -157.476  | 0.036                 | 0.059               | 0.093               | 0.059             | 0.000           | 0.000         | 1.010         | 0.009       |
| Kosrae     | 1    | outer         | 222.167  | 149.839 | 5.267    | 162.957   | 5.045                 | 2.822               | 5.070               | 2.823             | 0.013           | 0.004         | 1.184         | 0.115       |
| Kosrae     | 2    | outer         | 436.667  | 126.410 | 5.279    | 162.908   | 9.117                 | 3.145               | 9.141               | 3.146             | 0.013           | 0.008         | 1.240         | 0.135       |
| Kosrae     | 3    | outer         | 292.667  | 78.270  | 5.265    | 162.981   | 10.859                | 4.583               | 10.892              | 4.581             | 0.004           | 0.005         | 1.378         | 0.215       |
| Kosrae     | 4    | outer         | 357.000  | 89.170  | 5.373    | 163.003   | 9.990                 | 2.795               | 9.905               | 2.813             | 0.123           | 0.149         | 1.142         | 0.067       |
| Kosrae     | 5    | outer         | 478.333  | 141.020 | 5.375    | 162.997   | 16.415                | 5.460               | 16.432              | 5.450             | 0.021           | 0.041         | 1.221         | 0.099       |
| Kosrae     | 6    | outer         | 271.000  | 85.769  | 5.299    | 162.897   | 3.910                 | 2.980               | 3.940               | 2.983             | 0.007           | 0.009         | 1.328         | 0.099       |
| Kosrae     | 7    | outer         | 205.000  | 37.170  | 5.327    | 162.935   | 3.152                 | 1.197               | 3.174               | 1.197             | 0.015           | 0.011         | 1.161         | 0.030       |
| Kosrae     | 8    | outer         | 238.500  | 63.667  | 5.313    | 163.038   | 6.537                 | 1.419               | 6.574               | 1.418             | 0.001           | 0.001         | 1.046         | 0.025       |
| Kosrae     | 9    | outer         | 274.000  | 76.780  | 5.327    | 163.036   | 7.839                 | 2.170               | 7.871               | 2.168             | 0.004           | 0.003         | 1.064         | 0.027       |
| Kosrae     | 10   | outer         | 205.500  | 76.673  | 5.356    | 162.947   | 3.955                 | 2.034               | 3.532               | 1.706             | 0.460           | 0.946         | 1.458         | 0.147       |
| Kosrae     | 11   | outer         | 231.500  | 179.679 | 5.288    | 163.031   | 1.749                 | 1.815               | 1.768               | 1.801             | 0.018           | 0.024         | 1.083         | 0.043       |
| Kosrae     | 12   | outer         | 47.833   | 72.544  | 5.272    | 163.021   | 0.902                 | 1.510               | 0.935               | 1.504             | 0.004           | 0.006         | 1.091         | 0.095       |
| Kosrae     | 13   | outer         | 310.500  | 63.570  | 5.372    | 162.983   | 6.606                 | 2.391               | 6.596               | 2.456             | 0.047           | 0.097         | 1.186         | 0.132       |
| Kosrae     | 14   | outer         | 269.500  | 20.888  | 5.339    | 163.034   | 8.637                 | 0.468               | 8.671               | 0.466             | 0.003           | 0.003         | 1.146         | 0.032       |
| Kosrae     | 15   | outer         | 486.000  | 128.735 | 5.263    | 162.984   | 11.555                | 5.043               | 11.577              | 5.041             | 0.016           | 0.022         | 1.451         | 0.251       |
| Kosrae     | 16   | outer         | 336.000  | 58.839  | 5.369    | 162.977   | 10.692                | 2.277               | 10.722              | 2.279             | 0.007           | 0.007         | 1.103         | 0.016       |



|        |    |       |         |         |       |         |        |       |        |       |       |       |       |       |
|--------|----|-------|---------|---------|-------|---------|--------|-------|--------|-------|-------|-------|-------|-------|
| Kosrae | 17 | outer | 314.000 | 60.992  | 5.311 | 162.900 | 3.256  | 1.538 | 3.156  | 1.459 | 0.137 | 0.216 | 1.308 | 0.075 |
| Kosrae | 18 | outer | 339.000 | 80.880  | 5.373 | 162.985 | 8.764  | 2.025 | 8.780  | 2.029 | 0.022 | 0.016 | 1.202 | 0.060 |
| Kosrae | 19 | inner | 203.667 | 226.681 | 5.326 | 163.023 | 4.776  | 4.951 | 4.812  | 4.951 | 0.001 | 0.004 | 1.229 | 0.140 |
| Kosrae | 20 | inner | 190.667 | 93.234  | 5.344 | 162.953 | 3.492  | 1.707 | 3.523  | 1.707 | 0.006 | 0.003 | 1.198 | 0.129 |
| Kosrae | 21 | inner | 450.500 | 140.891 | 5.328 | 162.939 | 7.558  | 4.699 | 7.589  | 4.703 | 0.007 | 0.007 | 1.458 | 0.279 |
| Kosrae | 22 | inner | 401.333 | 171.907 | 5.346 | 162.950 | 8.254  | 3.578 | 8.277  | 3.584 | 0.014 | 0.012 | 1.423 | 0.121 |
| Kosrae | 23 | inner | 510.000 | 187.553 | 5.276 | 162.966 | 10.589 | 6.303 | 10.617 | 6.300 | 0.009 | 0.015 | 1.583 | 0.363 |
| Kosrae | 24 | inner | 293.500 | 104.313 | 5.350 | 162.954 | 6.339  | 2.966 | 6.371  | 2.964 | 0.005 | 0.006 | 1.609 | 0.309 |
| Majuro | 1  | outer | 335.000 | 25.768  | 7.125 | 171.262 | 10.859 | 2.914 | 10.913 | 2.915 | 0.012 | 0.007 | 1.146 | 0.192 |
| Majuro | 2  | outer | 329.000 | 90.830  | 7.223 | 171.070 | 9.501  | 2.535 | 9.566  | 2.535 | 0.001 | 0.001 | 1.005 | 0.013 |
| Majuro | 3  | outer | 172.833 | 109.788 | 7.167 | 171.033 | 4.206  | 2.926 | 4.248  | 2.930 | 0.023 | 0.013 | 1.170 | 0.101 |
| Majuro | 4  | outer | 108.167 | 31.096  | 7.170 | 171.034 | 2.525  | 1.082 | 2.567  | 1.073 | 0.024 | 0.019 | 1.209 | 0.078 |
| Majuro | 5  | outer | 187.500 | 55.544  | 7.120 | 171.052 | 6.202  | 2.472 | 6.260  | 2.471 | 0.007 | 0.005 | 1.116 | 0.059 |
| Majuro | 6  | outer | 187.000 | 87.489  | 7.171 | 171.164 | 4.994  | 1.225 | 5.043  | 1.227 | 0.016 | 0.021 | 1.125 | 0.071 |
| Majuro | 7  | outer | 411.667 | 70.441  | 7.127 | 171.341 | 11.916 | 1.933 | 11.970 | 1.929 | 0.011 | 0.010 | 1.019 | 0.010 |
| Majuro | 8  | outer | 207.500 | 63.689  | 7.082 | 171.147 | 7.146  | 2.239 | 7.195  | 2.235 | 0.017 | 0.016 | 1.148 | 0.086 |
| Majuro | 9  | outer | 249.667 | 94.629  | 7.064 | 171.189 | 8.255  | 3.343 | 8.286  | 3.345 | 0.034 | 0.052 | 1.081 | 0.044 |
| Majuro | 10 | outer | 296.667 | 45.946  | 7.219 | 171.054 | 8.796  | 3.527 | 8.716  | 3.655 | 0.145 | 0.276 | 1.159 | 0.099 |
| Majuro | 11 | outer | 261.333 | 106.680 | 7.127 | 171.320 | 7.395  | 3.143 | 7.446  | 3.139 | 0.014 | 0.019 | 1.019 | 0.004 |
| Majuro | 12 | patch | 266.333 | 176.240 | 7.148 | 171.167 | 6.510  | 4.671 | 6.559  | 4.665 | 0.016 | 0.010 | 1.274 | 0.063 |
| Majuro | 13 | patch | 291.167 | 179.204 | 7.187 | 171.051 | 5.732  | 2.732 | 5.777  | 2.736 | 0.021 | 0.024 | 1.217 | 0.131 |
| Majuro | 14 | patch | 542.500 | 178.947 | 7.103 | 171.103 | 7.663  | 2.739 | 7.725  | 2.740 | 0.003 | 0.003 | 1.220 | 0.087 |
| Majuro | 15 | patch | 13.333  | 17.061  | 7.119 | 171.327 | 0.274  | 0.329 | 0.339  | 0.329 | 0.000 | 0.001 | 1.005 | 0.009 |
| Majuro | 16 | patch | 442.167 | 260.901 | 7.169 | 171.140 | 12.742 | 7.195 | 12.799 | 7.197 | 0.008 | 0.005 | 1.257 | 0.139 |
| Majuro | 17 | patch | 588.833 | 232.765 | 7.114 | 171.082 | 9.401  | 5.106 | 9.465  | 5.108 | 0.002 | 0.002 | 1.194 | 0.108 |
| Majuro | 18 | patch | 350.000 | 152.493 | 7.175 | 171.122 | 15.132 | 5.889 | 15.185 | 5.891 | 0.012 | 0.007 | 1.265 | 0.100 |
| Majuro | 19 | patch | 78.833  | 34.505  | 7.072 | 171.196 | 2.122  | 0.958 | 2.161  | 0.948 | 0.026 | 0.031 | 1.167 | 0.115 |
| Majuro | 20 | patch | 52.500  | 60.411  | 7.109 | 171.090 | 1.095  | 1.403 | 1.157  | 1.403 | 0.003 | 0.002 | 1.086 | 0.027 |
| Majuro | 21 | patch | 86.500  | 70.415  | 7.121 | 171.321 | 1.522  | 1.267 | 1.581  | 1.259 | 0.006 | 0.013 | 1.014 | 0.005 |
| Majuro | 22 | patch | 645.000 | 173.623 | 7.149 | 171.171 | 13.519 | 3.052 | 13.576 | 3.052 | 0.008 | 0.003 | 1.247 | 0.088 |
| Majuro | 23 | patch | 388.333 | 142.315 | 7.201 | 171.072 | 6.285  | 2.710 | 6.319  | 2.699 | 0.031 | 0.034 | 1.098 | 0.099 |
| Majuro | 24 | patch | 34.500  | 33.662  | 7.152 | 171.235 | 0.532  | 0.516 | 0.593  | 0.519 | 0.005 | 0.007 | 1.040 | 0.004 |
| Palau  | 1  | outer | 142.667 | 61.805  | 7.770 | 134.568 | 4.164  | 1.906 | 4.189  | 1.898 | 0.032 | 0.060 | 1.098 | 0.060 |
| Palau  | 2  | outer | 439.167 | 64.322  | 7.773 | 134.577 | 13.673 | 2.751 | 13.724 | 2.751 | 0.006 | 0.006 | 1.135 | 0.038 |
| Palau  | 3  | outer | 92.167  | 67.113  | 7.250 | 134.451 | 3.572  | 2.878 | 3.622  | 2.879 | 0.006 | 0.004 | 1.271 | 0.091 |
| Palau  | 4  | outer | 54.667  | 41.409  | 7.317 | 134.575 | 1.504  | 1.088 | 1.555  | 1.086 | 0.007 | 0.011 | 1.000 | 0.000 |
| Palau  | 5  | outer | 644.500 | 89.440  | 7.310 | 134.229 | 15.869 | 2.141 | 15.880 | 2.117 | 0.046 | 0.051 | 1.179 | 0.082 |
| Palau  | 6  | outer | 89.500  | 46.642  | 7.464 | 134.637 | 2.022  | 0.823 | 2.040  | 0.763 | 0.039 | 0.067 | 1.000 | 0.000 |
| Palau  | 7  | outer | 98.167  | 66.004  | 7.570 | 134.637 | 3.072  | 2.092 | 3.107  | 2.089 | 0.022 | 0.032 | 1.088 | 0.062 |
| Palau  | 8  | outer | 575.333 | 145.642 | 7.278 | 134.245 | 17.377 | 7.374 | 17.428 | 7.374 | 0.006 | 0.010 | 1.174 | 0.057 |
| Palau  | 9  | inner | 330.667 | 92.865  | 7.276 | 134.301 | 6.972  | 3.435 | 7.008  | 3.443 | 0.021 | 0.030 | 1.324 | 0.169 |

|         |    |       |         |         |       |         |        |       |        |       |       |       |       |       |
|---------|----|-------|---------|---------|-------|---------|--------|-------|--------|-------|-------|-------|-------|-------|
| Palau   | 10 | inner | 622.333 | 51.399  | 7.450 | 134.461 | 5.293  | 2.795 | 5.348  | 2.795 | 0.003 | 0.002 | 1.180 | 0.038 |
| Palau   | 11 | inner | 243.833 | 148.742 | 7.326 | 134.530 | 1.941  | 1.092 | 1.997  | 1.092 | 0.001 | 0.001 | 1.283 | 0.120 |
| Palau   | 12 | inner | 562.333 | 117.595 | 7.327 | 134.468 | 6.977  | 4.171 | 7.029  | 4.171 | 0.005 | 0.003 | 1.558 | 0.169 |
| Palau   | 13 | inner | 416.333 | 87.744  | 7.343 | 134.431 | 5.934  | 3.195 | 5.990  | 3.195 | 0.001 | 0.001 | 1.372 | 0.117 |
| Palau   | 14 | inner | 486.000 | 161.789 | 7.340 | 134.430 | 6.417  | 4.585 | 6.469  | 4.589 | 0.005 | 0.007 | 1.256 | 0.092 |
| Palau   | 15 | patch | 501.833 | 169.899 | 7.646 | 134.548 | 14.075 | 5.011 | 14.127 | 5.010 | 0.005 | 0.004 | 1.092 | 0.112 |
| Palau   | 16 | patch | 533.833 | 210.469 | 7.355 | 134.348 | 8.769  | 3.970 | 8.824  | 3.970 | 0.002 | 0.002 | 1.143 | 0.095 |
| Palau   | 17 | patch | 593.000 | 124.284 | 7.485 | 134.418 | 14.183 | 2.402 | 14.238 | 2.401 | 0.002 | 0.002 | 1.389 | 0.151 |
| Palau   | 18 | patch | 569.833 | 135.152 | 7.354 | 134.404 | 6.313  | 3.852 | 6.361  | 3.855 | 0.008 | 0.006 | 1.070 | 0.055 |
| Palau   | 19 | patch | 481.333 | 156.376 | 7.317 | 134.294 | 9.714  | 3.059 | 9.765  | 3.057 | 0.006 | 0.006 | 1.205 | 0.056 |
| Palau   | 20 | patch | 686.167 | 110.032 | 7.373 | 134.388 | 9.565  | 3.001 | 9.620  | 3.001 | 0.001 | 0.001 | 1.207 | 0.112 |
| Palau   | 21 | patch | 416.000 | 92.455  | 7.479 | 134.425 | 7.788  | 2.299 | 7.838  | 2.298 | 0.007 | 0.004 | 1.181 | 0.157 |
| Palau   | 22 | patch | 587.167 | 149.146 | 7.244 | 134.416 | 18.871 | 4.366 | 18.921 | 4.364 | 0.007 | 0.006 | 1.237 | 0.127 |
| Palau   | 23 | patch | 396.333 | 219.337 | 7.188 | 134.267 | 12.065 | 7.085 | 12.119 | 7.086 | 0.003 | 0.003 | 1.156 | 0.136 |
| Palau   | 24 | patch | 569.667 | 133.816 | 7.255 | 134.314 | 19.275 | 9.981 | 19.330 | 9.982 | 0.002 | 0.002 | 1.269 | 0.065 |
| Pohnpei | 1  | outer | 271.167 | 39.306  | 6.918 | 158.345 | 8.013  | 0.935 | 8.072  | 0.935 | 0.001 | 0.001 | 1.036 | 0.011 |
| Pohnpei | 2  | outer | 263.000 | 62.360  | 7.001 | 158.147 | 9.832  | 2.425 | 9.814  | 2.396 | 0.077 | 0.170 | 1.114 | 0.080 |
| Pohnpei | 3  | outer | 140.833 | 43.462  | 6.784 | 158.127 | 4.146  | 2.533 | 4.182  | 2.516 | 0.023 | 0.029 | 1.104 | 0.180 |
| Pohnpei | 4  | outer | 41.833  | 37.712  | 6.842 | 158.350 | 0.851  | 0.509 | 0.889  | 0.516 | 0.022 | 0.014 | 1.046 | 0.055 |
| Pohnpei | 5  | outer | 471.667 | 106.402 | 6.980 | 158.120 | 18.065 | 6.078 | 17.715 | 6.247 | 0.409 | 0.620 | 1.055 | 0.034 |
| Pohnpei | 6  | outer | 27.667  | 42.231  | 6.828 | 158.332 | 1.092  | 2.225 | 1.113  | 2.235 | 0.039 | 0.082 | 1.120 | 0.015 |
| Pohnpei | 7  | outer | 350.000 | 66.906  | 6.988 | 158.329 | 10.692 | 2.512 | 10.751 | 2.512 | 0.000 | 0.001 | 1.029 | 0.008 |
| Pohnpei | 8  | outer | 331.000 | 84.150  | 6.771 | 158.229 | 7.853  | 1.609 | 7.896  | 1.609 | 0.017 | 0.012 | 1.394 | 0.203 |
| Pohnpei | 9  | inner | 489.333 | 141.706 | 6.927 | 158.108 | 3.105  | 0.926 | 3.161  | 0.926 | 0.003 | 0.004 | 1.469 | 0.189 |
| Pohnpei | 10 | patch | 138.000 | 188.583 | 6.976 | 158.160 | 2.171  | 2.789 | 2.219  | 2.792 | 0.011 | 0.012 | 1.113 | 0.104 |
| Pohnpei | 11 | inner | 58.333  | 63.990  | 6.808 | 158.161 | 0.567  | 0.455 | 0.617  | 0.460 | 0.009 | 0.009 | 1.420 | 0.142 |
| Pohnpei | 12 | inner | 494.833 | 105.433 | 6.859 | 158.133 | 7.659  | 2.200 | 7.715  | 2.200 | 0.003 | 0.003 | 1.590 | 0.244 |
| Pohnpei | 13 | inner | 504.500 | 214.712 | 6.954 | 158.282 | 9.652  | 4.797 | 9.709  | 4.793 | 0.002 | 0.005 | 1.360 | 0.305 |
| Pohnpei | 14 | inner | 157.167 | 141.841 | 6.848 | 158.340 | 2.655  | 2.794 | 2.711  | 2.795 | 0.003 | 0.004 | 1.336 | 0.207 |
| Pohnpei | 15 | patch | 565.667 | 118.822 | 6.894 | 158.106 | 7.455  | 2.078 | 7.506  | 2.078 | 0.008 | 0.004 | 1.171 | 0.089 |
| Pohnpei | 16 | patch | 693.667 | 126.840 | 6.973 | 158.128 | 11.874 | 4.361 | 11.926 | 4.364 | 0.007 | 0.004 | 1.460 | 0.131 |
| Pohnpei | 17 | patch | 310.000 | 196.544 | 6.940 | 158.085 | 5.469  | 4.271 | 5.467  | 4.190 | 0.061 | 0.124 | 1.150 | 0.063 |
| Pohnpei | 18 | patch | 465.333 | 181.924 | 6.818 | 158.153 | 9.467  | 5.378 | 9.521  | 5.378 | 0.005 | 0.006 | 1.511 | 0.160 |
| Pohnpei | 19 | patch | 490.500 | 110.132 | 7.013 | 158.239 | 7.133  | 0.863 | 7.178  | 0.864 | 0.015 | 0.011 | 1.302 | 0.096 |
| Pohnpei | 20 | patch | 649.000 | 135.036 | 6.989 | 158.317 | 7.695  | 3.800 | 7.742  | 3.801 | 0.012 | 0.006 | 1.466 | 0.197 |
| Pohnpei | 21 | patch | 741.667 | 46.945  | 6.976 | 158.244 | 7.369  | 1.748 | 7.413  | 1.749 | 0.016 | 0.016 | 1.290 | 0.094 |
| Pohnpei | 22 | patch | 694.833 | 119.854 | 6.978 | 158.133 | 9.355  | 3.302 | 9.411  | 3.301 | 0.004 | 0.003 | 1.243 | 0.185 |
| Pohnpei | 23 | patch | 241.333 | 115.303 | 6.864 | 158.354 | 4.757  | 2.411 | 4.773  | 2.451 | 0.043 | 0.057 | 1.231 | 0.103 |
| Pohnpei | 24 | patch | 553.167 | 145.912 | 6.933 | 158.330 | 9.131  | 1.950 | 9.180  | 1.957 | 0.010 | 0.015 | 1.279 | 0.228 |
| Yap     | 1  | outer | 226.167 | 111.406 | 9.482 | 138.124 | 5.446  | 2.428 | 5.499  | 2.429 | 0.006 | 0.004 | 1.089 | 0.073 |
| Yap     | 2  | outer | 515.333 | 52.244  | 9.557 | 138.086 | 11.398 | 0.931 | 11.454 | 0.932 | 0.003 | 0.005 | 1.266 | 0.113 |

|     |    |       |         |         |       |         |        |        |        |        |       |        |       |       |
|-----|----|-------|---------|---------|-------|---------|--------|--------|--------|--------|-------|--------|-------|-------|
| Yap | 3  | outer | 124.833 | 36.080  | 9.424 | 138.045 | 4.136  | 1.286  | 4.191  | 1.284  | 0.005 | 0.004  | 1.017 | 0.020 |
| Yap | 4  | outer | 478.000 | 115.211 | 9.446 | 138.039 | 20.077 | 4.826  | 20.131 | 4.828  | 0.005 | 0.004  | 1.258 | 0.119 |
| Yap | 5  | outer | 521.500 | 69.779  | 9.603 | 138.122 | 18.170 | 3.886  | 13.747 | 12.144 | 4.482 | 10.900 | 1.016 | 0.040 |
| Yap | 6  | outer | 335.333 | 68.684  | 9.587 | 138.201 | 17.893 | 7.862  | 17.943 | 7.861  | 0.009 | 0.005  | 1.000 | 0.000 |
| Yap | 7  | outer | 405.167 | 81.007  | 9.591 | 138.198 | 19.641 | 11.565 | 19.656 | 11.505 | 0.044 | 0.065  | 1.000 | 0.000 |
| Yap | 8  | outer | 126.000 | 19.980  | 9.454 | 138.090 | 3.513  | 0.715  | 3.552  | 0.723  | 0.020 | 0.012  | 1.064 | 0.010 |
| Yap | 9  | outer | 443.667 | 231.932 | 9.619 | 138.132 | 12.580 | 7.209  | 12.634 | 7.207  | 0.004 | 0.004  | 1.079 | 0.089 |
| Yap | 10 | outer | 435.500 | 90.688  | 9.581 | 138.204 | 13.019 | 3.997  | 13.016 | 3.967  | 0.063 | 0.065  | 1.277 | 0.235 |
| Yap | 11 | inner | 548.167 | 168.116 | 9.478 | 138.112 | 15.203 | 4.992  | 15.255 | 4.992  | 0.007 | 0.002  | 1.000 | 0.000 |
| Yap | 12 | inner | 318.667 | 51.821  | 9.657 | 138.160 | 8.954  | 2.521  | 8.817  | 2.481  | 0.196 | 0.260  | 1.019 | 0.045 |
| Yap | 13 | inner | 323.667 | 91.264  | 9.556 | 138.209 | 7.291  | 3.122  | 7.315  | 3.097  | 0.035 | 0.043  | 1.048 | 0.074 |
| Yap | 14 | inner | 652.833 | 184.507 | 9.520 | 138.129 | 2.540  | 0.694  | 2.518  | 0.716  | 0.081 | 0.087  | 1.111 | 0.092 |
| Yap | 15 | inner | 392.333 | 68.266  | 9.466 | 138.088 | 11.287 | 3.032  | 11.341 | 3.034  | 0.005 | 0.004  | 1.149 | 0.127 |
| Yap | 16 | inner | 674.667 | 116.330 | 9.579 | 138.185 | 9.522  | 6.071  | 9.573  | 6.073  | 0.008 | 0.007  | 1.457 | 0.140 |
| Yap | 17 | inner | 333.500 | 76.432  | 9.608 | 138.132 | 10.247 | 3.986  | 10.293 | 3.988  | 0.014 | 0.008  | 1.117 | 0.140 |
| Yap | 18 | inner | 333.833 | 96.549  | 9.428 | 138.048 | 8.321  | 2.532  | 8.376  | 2.533  | 0.004 | 0.003  | 1.093 | 0.104 |
| Yap | 19 | inner | 444.000 | 97.092  | 9.607 | 138.160 | 2.208  | 0.574  | 2.266  | 0.574  | 0.001 | 0.001  | 1.205 | 0.085 |
| Yap | 20 | inner | 332.333 | 137.769 | 9.618 | 138.133 | 6.646  | 2.424  | 6.696  | 2.419  | 0.009 | 0.007  | 1.000 | 0.000 |
| Yap | 21 | inner | 392.000 | 144.585 | 9.555 | 138.090 | 13.648 | 6.467  | 13.621 | 6.389  | 0.085 | 0.099  | 1.000 | 0.000 |
| Yap | 22 | inner | 291.167 | 85.707  | 9.600 | 138.129 | 9.328  | 5.923  | 9.388  | 5.923  | 0.000 | 0.000  | 1.000 | 0.000 |
| Yap | 23 | inner | 59.333  | 39.988  | 9.596 | 138.128 | 1.094  | 0.873  | 1.143  | 0.867  | 0.010 | 0.010  | 1.000 | 0.000 |
| Yap | 24 | inner | 307.833 | 39.179  | 9.588 | 138.181 | 6.003  | 2.498  | 5.927  | 2.585  | 0.135 | 0.225  | 1.171 | 0.046 |

## References

Bonaldo RM, Bellwood DR (2008). Size-dependent variation in the functional role of the parrotfish *Scarus rivulatus* on the Great Barrier Reef, Australia. *Marine Ecology Progress Series*. 360: 237–244.

Glynn PW (1997). Bioerosion and coral-reef growth: a dynamic balance. In, C Birkeland (ed) *Life and Death of Coral Reefs*, Publisher, Chapman and Hall, USA. 68–95.

Hollister J, Shah T, Robitaille A, Beck M, Johnson M (2020). *elevatr: Access Elevation Data from Various APIs*. R package version 0.3.1, doi:10.5281/zenodo.4282962, <https://github.com/usepa/elevatr/>.

Hubbard DK (1997) Reefs as dynamic systems. In, C. Birkeland (ed) *Life and Death of Coral Reefs*, Publisher, Chapman and Hall, USA. 43–67.

Januchowski-Hartley FA, Graham NAJ, Wilson SK, Jennings S, Perry CT (2017) Drivers and predictions of coral reef carbonate budget trajectories. *Proceedings of the Royal Society B*. 284: 20162533.

Lucas CD, Python A, Redding DW (2020) Graphical outputs and spatial cross-validation for the INLA-package using INLAutils. *The R Journal*, preprint: arXiv:2004.02324.

Ong L, Holland KN (2010) Bioerosion of coral reefs by two Hawaiian parrotfishes: species, size differences and fishery implications. *Marine Biology*. 157: 1313–1323.

Perry CT, Edinger EN, Kench PS, Murphy GN, Smithers SG, Steneck RS, Mumby PJ (2012) Estimating rates of biologically driven coral reef framework production and erosion: a new census-based carbonate budget methodology and applications to the reefs of Bonaire. *Coral Reefs*. 31: 853–868.

R Core Team (2020) R: A language and environment for statistical computing. R Foundation for Statistical Computing, Vienna, Austria. URL <https://www.R-project.org/>.

van Woesik R, Cacciapaglia CW (2018) Keeping up with sea-level rise: Carbonate production rates in Palau and Yap, western Pacific Ocean. *PLoS ONE* 13(5): e0197077.

van Woesik R, Cacciapaglia C (2019) Carbonate production of Micronesian reefs suppressed by thermal anomalies and *Acanthaster* as sea-level rises. *PloS One* 14(11): e0224887.
